1  
2  
3  
4  
5  
6  
7  
8  
9  
10  
11  
12  
13  
14  
15  
16  
17  
18  
19  
20  
21  
22  
23  
24  
25  
26  
27  
28  
29  
30  
31  
32  
33  
34

**SEPALLATA-driven MADS transcription factor tetramerization is required for inner whorl floral organ development**

Veronique Hugouvieux<sup>1,\*</sup>, Romain Blanc-Mathieu<sup>1</sup>, Michel Paul<sup>1</sup>, Aline Janeau<sup>1</sup>, Xiaocai Xu<sup>2</sup>, Jeremy Lucas<sup>1</sup>, Xuelei Lai<sup>1,3</sup>, Antonin Galien<sup>1</sup>, Wenhao Yan<sup>2,4</sup>, Max Nanao<sup>5</sup>, Kerstin Kaufmann<sup>2</sup>, François Parcy<sup>1</sup> and Chloe Zubieta<sup>1,\*</sup>

<sup>1</sup> Laboratoire de Physiologie Cellulaire et Végétale, Université Grenoble-Alpes, CNRS, CEA, INRAE, IRIG-DBSCI, 17 rue des Martyrs, 38000 Grenoble, France.

<sup>2</sup> Plant Cell and Molecular Biology, Institute of Biology, Humboldt-Universität zu Berlin, Berlin, Germany.

<sup>3</sup> Current address: National Key Laboratory of Crop Genetic Improvement, Hubei Hongshan Laboratory, Huazhong Agricultural University, Wuhan, China.

<sup>4</sup> Current address: College of Plant Science and Technology, Wheat Genetics and regulomics, Huazhong Agricultural University, Wuhan, China.

<sup>5</sup> Structural Biology, European Synchrotron Radiation Facility, 71 Avenue des Martyrs, 38000 Grenoble, France.

**\* To whom correspondence should be addressed: [veronique.hugouvieux@cea.fr](mailto:veronique.hugouvieux@cea.fr); [chloe.zubieta@cea.fr](mailto:chloe.zubieta@cea.fr)**

**Short Title: MADS tetramer formation is required for floral organ development**

**Material distribution:** The authors responsible for distribution of materials integral to the findings presented in this article in accordance with the policy described in the Instructions for Authors (<https://academic.oup.com/plcell/pages/General-Instructions>) are: Véronique Hugouvieux ([veronique.hugouvieux@cea.fr](mailto:veronique.hugouvieux@cea.fr)) and Chloe Zubieta ([chloe.zubieta@cea.fr](mailto:chloe.zubieta@cea.fr)).

35 **Abstract**

36 MADS genes encode transcription factors that act as master regulators of plant reproduction  
37 and flower development. The SEPALLATA (SEP) subfamily is required for the development  
38 of floral organs and plays roles in inflorescence architecture and development of the floral  
39 meristem. The SEPALLTAs act as organizers of MADS complexes, forming both  
40 heterodimers and heterotetramers *in vitro*. To date, the MADS complexes characterized in  
41 angiosperm floral organ development contain at least one SEPALLATA protein. Whether  
42 DNA-binding by SEPALLATA-containing dimeric MADS complexes are sufficient for  
43 launching floral organ identity programs, however, is not clear as only defects in floral  
44 meristem determinacy were observed in tetramerization impaired SEPALLATA mutants.  
45 Here, we used a combination of genome-wide binding studies, high resolution structural  
46 studies of the SEP3/AGAMOUS tetramerization domain, structure-based mutagenesis and  
47 complementation experiments in *sep1 sep2 sep3* and *sep1 sep2 sep3 ag-4* plants transformed  
48 with versions of *SEP3* encoding tetramerization mutants. We demonstrate that while SEP3  
49 heterodimers are able to bind DNA both *in vitro* and *in vivo* and recognize the majority of  
50 SEP3 wild type binding sites genome-wide, tetramerization is not only required for floral  
51 meristem determinacy, but also absolutely required for floral organ identity in the second,  
52 third and fourth whorls.

53

54 **Introduction**

55 MADS genes play central roles in the development of reproductive structures, from  
56 the specification of male and female cones in gymnosperms<sup>1-5</sup> to the development of  
57 inflorescence architecture,<sup>6,7</sup> determinacy of the floral meristem<sup>8</sup> and the specification of  
58 floral organ identity in angiosperms<sup>2,9,10</sup>. The encoded MADS transcription factors (MTFs)  
59 bind to a highly conserved DNA sequence called a CArG box (CC-“Adenine-rich”-GG) as  
60 obligate dimers. The MTFs involved in reproductive development belong to the MADS type  
61 II, or MEF2 clade, and have a multidomain structure<sup>11</sup>. These domains consist of the highly  
62 conserved eukaryotic-specific DNA-binding MADS domain (M domain), a ~30 amino acid  
63 alpha helical Intervening domain (I domain) critical for dimerization specificity<sup>12</sup>, a plant-  
64 specific coiled-coil Keratin-like oligomerization domain (K domain) and a largely  
65 unstructured and sequence-variable C-terminal domain (C domain). Based on this conserved  
66 domain structure, the type II MADS are also called MIKC and form two main groups which  
67 differ in their oligomerization capability. The “classic” MIKC<sup>c</sup> group form dimers and  
68 tetramers and are important for reproductive structure development and organ identity. The

69 MIKC\* group, dimeric MTFs, has a more limited role in male gametophyte development<sup>13,14</sup>.  
70 The well-established ABCE genetic model of floral organ identity requires the combinatorial  
71 activity of the MIKC<sup>c</sup> genes<sup>15</sup>.

72 In floral organ development, the MADS genes are divided into the A (*SQUAMOSA*,  
73 *SQUA-like*), B (*DEFICIENS/GLOBOSA*, *DEF/GLO-like*), C (*AGAMOUS*, *AG-like*) and E  
74 (*AGL2/AGL6* or *SEP-like*) class genes<sup>2</sup>. The most recent common ancestor of seed plants  
75 likely contained both an A and E class ancestor which has been lost in gymnosperms<sup>16</sup>. Extant  
76 gymnosperms contain only B and C class MADS genes<sup>2</sup>, with B and C class-encoded MTFs  
77 directly interacting to specify the formation of male cones and the C-class MADS complexes  
78 specifying of female cones<sup>4,17</sup>. While gymnosperm B and C-class MTFs are able to directly  
79 interact and likely form tetrameric complexes, this property has been lost in flowering plants,  
80 which require the angiosperm-specific SEPALLATA (SEP) subfamily (E class) to allow  
81 interaction of B and C MTFs for third whorl organ specification (stamen). Likewise, female  
82 organ development (carpel) in the fourth whorl of angiosperms also requires the E class SEP  
83 subfamily in addition to the C class MADS<sup>5,18,19</sup>. The identity programs for the perianth  
84 organs (sepals and petals) in angiosperms require an A class MADS gene, with sepal  
85 formation in *Arabidopsis* dependent on A and E class MTFs and A, B and E class MTFs  
86 required for the determination of second whorl petal identity<sup>15,20</sup>. The tetramerization domain  
87 was recruited early in seed plant evolution, with more promiscuous tetramerization putatively  
88 occurring between different MIKC<sup>c</sup> MTFs in ancestral species. Loss of direct tetramerization  
89 capability between B and C class MTFs occurred after the gymnosperm-angiosperm split,  
90 with the E class SEPALLATAs taking over the tetramerization function. Based on these data,  
91 tetramer formation has been long hypothesized to be key for reproductive organ development  
92 triggered by MTFs. However, direct evidence for this has remained elusive, due in part to the  
93 limitations in protein-protein interaction studies which mainly identify binary interactions, the  
94 difficulty in characterizing transcriptionally active MADS complexes *in vitro* and *in vivo* and  
95 the study of loss-of-function mutants which are not sufficient to probe development as a  
96 function of different oligomerization states.

97 In *Arabidopsis thaliana*, which contains four *SEP* genes, triple (*sep1 sep2 sep3*) and  
98 quadruple (*sep1 sep2 sep3 sep4*) mutants display strong floral phenotypes, including loss of  
99 meristem determinacy and homeotic conversion of floral organs into sepaloid or leaf-like  
100 organs, respectively<sup>21-23</sup>. Furthermore, 35S-driven expression of B and/or C class MADS  
101 genes alone is not sufficient to launch floral organ identity programs and the concurrent  
102 expression of a *SEP* gene is required for the formation of ectopic floral organs<sup>21,22,24,25</sup>. At the

103 molecular level, this suggests that SEP-containing heterodimers or tetramers are required for  
104 proper MADS function. Extensive yeast 2-hybrid experiments have demonstrated that SEP  
105 MTFs are able to oligomerize with class A, B and C MTFs. Yeast 3-hybrid and *in vitro*  
106 experiments further demonstrate the formation of SEP-containing heterotetrametric  
107 complexes, 2-site DNA binding and DNA-looping<sup>26-29</sup>. Recent studies using a  
108 tetramerization-impaired *SEP3* allele, *SEP3<sup>Atet</sup>*, expressed in the *sep1 sep2 sep3* mutant  
109 background attempted to decouple DNA binding and oligomerization state. This work  
110 demonstrated that robust tetramerization is required for floral meristem determinacy, but left  
111 open the question as to the role of tetramerization in floral organ identity as second and third  
112 whorl organ identity programs were not affected and fourth whorl organ identity was only  
113 partially perturbed compared to the loss-of-function *sep1 sep2 sep3* triple mutant<sup>30</sup>.  
114 Examination of genome-wide binding using sequential DNA affinity purification and  
115 sequencing (seq-DAP-seq) indicated two-site co-operative binding at certain loci by SEP3/AG  
116 tetramers, the complex required for fourth whorl organ identity, which was lost in complexes  
117 containing *SEP3<sup>Atet</sup>*, further suggesting that hetero-dimerization of E and C class MTFs may  
118 be sufficient for carpel identity<sup>30</sup>.

119 In order to address the fundamental question of the physiological role of  
120 tetramerization in flower development, we performed structural, biochemical, and *in vivo*  
121 experiments to correlate oligomerization state with DNA-binding and physiological function.  
122 Using structure-based design, we generated SEP3 and AG mutants with strongly abrogated  
123 tetramerization capability and compared their DNA-binding and ability to rescue the *sep1*  
124 *sep2 sep3* triple mutant phenotype. These results demonstrate that while SEP3-containing  
125 dimeric complexes bind many of the same sites as SEP3-containing tetramers genome-wide,  
126 they are unable to restore organ identity in the second, third and fourth whorls. Short-range  
127 binding site co-operativity based on intersite spacing enrichment is strongly reduced in the  
128 tetramerization mutants in seq-DAP-seq experiments and band-shift assays, pointing to a  
129 mechanism of DNA looping as important for proper gene regulation in organ identity. Taken  
130 together, these data show the absolute requirement of tetramerization for organ specification  
131 and proper cellular identity of petals, stamen and carpels.

132

## 133 RESULTS

### 134 **SEP3 oligomerization, structural studies and mutant design**

135 The importance of MADS tetramerization in floral organ development has been  
136 extensively investigated, most recently in the context of the central role of *SEP3*, the only

137 *SEP* gene able to fully complement organ identity as a single allele in the *sep1 sep2 sep3*  
138 triple mutant (Supplemental Figure S1). Using a natural splice variant impaired in  
139 tetramerization, *SEP3*<sup>Δtet</sup>, *in vitro* DNA-binding studies demonstrated the loss of co-operative  
140 two-site DNA binding for the *SEP3/AG* heterocomplex, responsible for fourth whorl  
141 development and determinacy<sup>31</sup>. Relatively mild effects were observed *in vivo* in  
142 complementation assays, with phenotypes restricted to the fourth whorl and indeterminacy of  
143 the floral meristem<sup>30</sup>. Genome-wide binding studies using ChIP-seq (Supplemental Figure  
144 S2A) coupled with comparative RNA-seq of *SEP3* and *SEP3*<sup>Δtet</sup> expressing plants  
145 (Supplemental Figure S2B and C) were consistent with the observed phenotypes and  
146 highlighted relatively few differences in DNA-binding or gene regulation between *SEP3* and  
147 *SEP3*<sup>Δtet</sup> *in vivo*. This may be due to the residual ability of *SEP3*<sup>Δtet</sup> to tetramerize *in vivo* with  
148 MADS partners, and would account for the rescue of second and third whorl organ identity as  
149 well as the partial restoration of fourth whorl identity as previously described<sup>30</sup>.

150 In order to better design *SEP3* mutants no longer able to tetramerize, we solved the  
151 structure of the physiologically relevant MADS heterotetrameric *SEP3/AG* K domain  
152 complex, using seleno-methionine derivatized protein and single anomalous dispersion (SAD)  
153 phasing. A partial structure was autobuilt using ARP/wARP<sup>32</sup> and subsequently used for  
154 molecular replacement of a higher resolution native *SEP3/AG* dataset. The protein complex  
155 crystallized in spacegroup C222<sub>1</sub> with 8 molecules per asymmetric unit. The resolution was  
156 2.4Å for the native dataset and the refined model exhibited very good geometry and no  
157 residues in disallowed regions of the Ramachandran plot (Table 1). As shown in Figure 1A,  
158 the crystal structure of *SEP3/AG* contains the complete K domains of *SEP3* and *AG*, a small  
159 portion of the I domain and several residues of the C domain, with the tetramer adopting a  
160 cross-like configuration with outstretched alpha helical “arms”. The overall structure is very  
161 similar to the previously described *SEP3* homotetramer (PDB 40XO), however the tetramer  
162 of *SEP3/AG* exhibits additional salt bridge interactions along the protein-protein interface  
163 (Figure 1B)<sup>29</sup>. Structural comparisons between *SEP3/AG* and *SEP3* tetramers (Figure 1C)  
164 reveals a slight change in orientation of the alpha helical arms, with *SEP3/AG* exhibiting a  
165 more planar orientation of the N-terminal helices.

166 Examination of the highly conserved hydrophobic leucine zipper critical for  
167 tetramerization allowed us to design point mutations to generally target the tetramerization  
168 interface for *SEP3*-containing MADS complexes (Figure 1D and E). In addition to the  
169 *SEP3*<sup>Δtet</sup> mutation that deletes residues 161-174, three additional point mutations were  
170 introduced to create a new mutant, *SEP3*<sup>Δtet3M</sup>, carrying the 161-174 amino acid deletion and

171 mutations M150A, L154A and L157A (Figure 1D and E). The introduced mutations are all  
172 present at the predicted protein-protein interface for the heterotetrameric MADS protein  
173 complexes, suggesting that these mutations should universally disrupt SEP3-dependent  
174 tetramerization. In addition, the *ag-4* allele, which encodes a version of AG lacking residues  
175 159-172, which we refer to as AG<sup>Δtet</sup>, was mapped to the SEP3/AG structure (Figure 1D and  
176 E). This deletion mutant affects the N-terminal portion of the SEP3/AG tetramerization  
177 interface. Based on the structure of SEP3/AG, the combination of SEP3<sup>Δtet</sup> and AG<sup>Δtet</sup> results  
178 in a SEP3/AG complex unable to tetramerize as it completely lacks the interface required for  
179 stable tetramer formation.

180

### 181 ***In vitro* characterization of SEP3<sup>Δtet</sup> and SEP3<sup>Δtet3M</sup> protein complexes**

182 Electrophoretic mobility shift assays (EMSA) were performed to evaluate the impact  
183 of mutations on MADS complex formation and DNA binding. First, we tested different SEP3  
184 mutants with AG and AG<sup>Δtet</sup>. As shown in Figure 2A, EMSAs performed with SEP3<sup>Δtet3M</sup>/AG  
185 or with SEP3<sup>Δtet</sup>/AG<sup>Δtet</sup> confirmed that the mutations completely abolish heterotetramer  
186 formation *in vitro*, as observed by the complete disappearance of the band corresponding to  
187 tetrameric complexes. As previously reported, SEP3<sup>Δtet</sup> was only partially impaired in its  
188 ability to form heterotetramers with AG<sup>30</sup>. In all cases, mutations did not impair dimer  
189 formation and binding to DNA as confirmed by the presence of a strong band corresponding  
190 to migration of a dimer bound to DNA.

191 Next, we evaluated SEP3 and AG mutants for their ability to affect complexes  
192 important for third whorl (AP3/PI/AG/SEP3) organ identity and SEP3 mutants for second  
193 whorl (AP1/AP3/PI/SEP3) identity. When co-expressed with AG/AP3/PI (Figure 2B) or  
194 AP1/AP3/PI (Figure 2C), SEP3<sup>Δtet3M</sup> was more strongly affected in tetramer formation than  
195 SEP3<sup>Δtet</sup>, as indicated by a less intense upper tetramerization band and a more intense lower  
196 band corresponding to a dimer-bound DNA complex. Interestingly, heterocomplex formation  
197 was completely abolished between AP3/PI/AG<sup>Δtet</sup>/SEP3<sup>Δtet</sup>, as no band corresponding to the  
198 hetero-complex was observed (Figure 2B). Taken together, the data show that the SEP3<sup>Δtet3M</sup>  
199 mutant, or the combination of SEP3<sup>Δtet</sup> and AG<sup>Δtet</sup>, provoke much stronger tetramerization  
200 defects *in vitro* than SEP3<sup>Δtet</sup> alone, as effects on co-operative DNA-binding were observable  
201 for MADS complexes involved in second, third and fourth whorl, and third and fourth organ  
202 identity, respectively.

203

### 204 **Comparison of DNA-binding by SEP3<sup>Δtet3M</sup>/AG and SEP3<sup>Δtet</sup>/AG<sup>Δtet</sup> complexes**

205           Based on these results, SEP3<sup>Δtet3M</sup> containing complexes and the SEP3<sup>Δtet</sup>/AG<sup>Δtet</sup>  
206 complex almost completely abolish tetramer formation as compared to SEP3<sup>Δtet</sup> on individual  
207 binding sites. We used seq-DAP-seq for a genome-wide comparison of the binding of the  
208 three complexes (SEP3<sup>Δtet</sup>/AG, SEP3<sup>Δtet3M</sup>/AG and SEP3<sup>Δtet</sup>/AG<sup>Δtet</sup>) at regions bound by the  
209 wild type SEP3/AG. Our previous analysis using seq-DAP-seq showed that the SEP3<sup>Δtet</sup>  
210 mutation reduced both the binding affinity and the preference for specific CARG-box spacing  
211 (36, 46, 56 bp)<sup>31</sup>. We considered a region to be ‘unbound’ by a mutant complex for which the  
212 binding intensity is decreased by at least a factor two (Coverage Fold Reduction CFR > 2) as  
213 compared to SEP3/AG binding (Figure 3). Most regions (> 4672, 74%) were bound with  
214 similar intensity (CFR relative to SEP3/AG < 2) by all complexes (Figure 3A). The presence  
215 of SEP3<sup>Δtet3M</sup> or AG<sup>Δtet</sup> in the heterocomplex led to an additional binding reduction as  
216 compared to the SEP3<sup>Δtet</sup> mutation alone with 690 and 686 regions bound by SEP3<sup>Δtet</sup>/AG and  
217 not by SEP3<sup>Δtet3M</sup>/AG or SEP3<sup>Δtet</sup>/AG<sup>Δtet</sup>, respectively. Of these newly lost regions, 377 were  
218 shared by SEP3<sup>Δtet3M</sup>/AG and SEP3<sup>Δtet</sup>/AG<sup>Δtet</sup> complexes. Moreover, genome-wide, the  
219 median binding intensity of SEP3<sup>Δtet3M</sup>/AG and SEP3<sup>Δtet</sup>/AG<sup>Δtet</sup> relative to that of the  
220 SEP3<sup>Δtet</sup>/AG mutant had a stronger decrease at regions containing a preferred CARG-box  
221 intersite spacing as compared to regions with no preferred CARG-box intersite spacing  
222 (Wilcoxon test,  $P=7 \times 10^{-14}$  and 0.0005 for SEP3<sup>Δtet3M</sup>/AG and SEP3<sup>Δtet</sup>/AG<sup>Δtet</sup>, respectively),  
223 suggesting that SEP3<sup>Δtet3M</sup>/AG and SEP3<sup>Δtet</sup>/AG<sup>Δtet</sup> are less able to bind interspaced CARG-  
224 boxes as compared to SEP3<sup>Δtet</sup>/AG (Figure 3B). The list of genes associated with at least a  
225 two-fold reduction in binding between the wild type and tetramerization mutants is given in  
226 Table SI and includes genes such as *KANADI2* (*KAN2*), which encodes a TF involved in  
227 carpel and ovule development and the establishment of polarity of floral organs<sup>33,34</sup>, *JAGGED*  
228 (*JAG*), which encodes a zinc-finger TF important for stamen and carpel development<sup>35,36</sup> and  
229 *INNER NO OUTER* (*INO*), a gene encoding a YABBY TF implicated in ovule integument  
230 development<sup>37</sup>. Taken together, these *in vitro* genome-wide binding comparisons demonstrate  
231 a small but statistically significant impairment of SEP3<sup>Δtet3M</sup>/AG and SEP3<sup>Δtet</sup>/AG<sup>Δtet</sup> DNA-  
232 binding compared to SEP3<sup>Δtet</sup>/AG, and a strong decrease in regions bound by tetrameric  
233 SEP3/AG complexes. This suggests a genome-wide quantitative relationship between  
234 tetramer formation and access to regions showing specific intersite spacing at certain loci,  
235 with these regions putatively acting as important organ identity determinants.

236

237 **Impact of MADS tetramerization mutants in floral organ development and cell identity**

238           Based on *in vitro* data, the series of mutations targeting the tetramerization interface  
239 were used to assess the importance of MADS tetramerization in the different floral organ  
240 development programs. We generated *sep1 sep2 sep3* plants expressing *SEP3*, *SEP3<sup>Atet</sup>* or  
241 *SEP<sup>Atet3M</sup>*, and *sep1 sep2 sep3 ag-4* plants expressing *SEP3<sup>Atet</sup>* and analyzed the overall  
242 morphology of each floral organ and the surface cell identity in the second, third and fourth  
243 whorls by scanning electron microscopy (SEM) (Figures 4 and 5). The *sep1 sep2 sep3* mutant  
244 exhibited conversion of all floral organs to sepaloid structures that showed numerous stomata  
245 and typical elongated cells at their surfaces (Figures 4 and 5, first columns). The lack of  
246 determinacy of the floral meristem results in the continuous generation of a new “flower”  
247 made of sepaloid organs in the fourth whorl (Figure 4)<sup>21,30</sup>. Flowers of *sep1 sep2 sep3* plants  
248 expressing *SEP3* were fully complemented (Figure 4, second column) and showed WT petals,  
249 stamens and carpels in whorls 2, 3 and 4, respectively, with conical cells, pollen grains and  
250 stigmatic papilla, style and replum cells at the appropriate organ surface (Figure 5, second  
251 column). As previously described, *SEP3<sup>Atet</sup>* expression in *sep1 sep2 sep3* was able to fully  
252 complement petal and stamen formation in whorls 2 and 3, but only partially complemented  
253 whorl 4, which exhibited two unfused carpel-like structures and indeterminacy (Figures 4 and  
254 5, third column)<sup>30</sup>. In contrast, flowers of plants expressing *SEP3<sup>Atet3M</sup>* (Figures 4 and 5, fourth  
255 column) showed significant defects in whorls 2 and 3 compared to *SEP3<sup>Atet</sup>* expressing plants,  
256 and no carpel-like structures in whorl 4. In the second whorl, the petaloid organs were much  
257 shorter than WT petals and remained green (Figure 4). No stomata cells were visible and  
258 conical cells were only occasionally observed by SEM (Figure 5). In the third whorl, only  
259 immature greenish stamen could be observed (Figure 4). Small blisters at the organ margin  
260 that resemble developing pollen sacs were also noted but no pollen grains were produced  
261 (Figure 5). The number of organs in whorls 2 and 3 was not affected in these plants, with four  
262 and six organs in the second and third whorls, respectively. These data show that reducing the  
263 ability of *SEP3* to tetramerize results in increasingly strong defects in floral organs, including  
264 incomplete organ differentiation and cell identity, notably in whorls 2 and 3 that were  
265 unaffected in the *SEP3<sup>Atet</sup>* expressing plants.

266           In order to further examine the role of tetramerization, the *sep1 sep2 sep3 ag-4*  
267 expressing *SEP3<sup>Atet</sup>* mutant was generated by crossing *sep1 sep2 sep3* expressing *SEP3<sup>Atet</sup>* and  
268 *sep1 sep2 ag-4<sup>+/-</sup>*. Due to the very low number of seeds produced, a single *sep1 sep2 sep3 ag-*  
269 *4* plant expressing *SEP3<sup>Atet</sup>* was genotyped and analyzed (Figures 4 and 5, fifth column). This  
270 mutant showed strong floral organ defects specifically in whorls 3 and 4, as would be  
271 expected due to both *SEP3<sup>Atet</sup>* and *AG<sup>Atet</sup>* exhibiting impaired tetramerization. In whorl 3, the



272 stamens were replaced by six petaloid organs with conical cells characteristic of petals  
273 (Figures 4 and 5). As AG is required for repressing *API* expression in the third whorl, the  
274 lack of AG function due to impaired tetramerization would be predicted to result in petal  
275 formation instead of stamens in whorl 3, as shown in the *ag* loss-of-function mutants<sup>38</sup>. Whorl  
276 4 was not complemented, showing an indeterminate flower consisting of sepaloid structures  
277 with characteristic elongated cells, as in *sep1 sep2 sep3* plants or *sep1 sep2 sep3* plants  
278 expressing *SEP3<sup>Atet3M</sup>* (Figures 4 and 5). Conversion of stamens to petaloid organs was also  
279 observed in 7 plants genotyped *sep1 sep2 sep3<sup>+/-</sup> ag-4* expressing *SEP3<sup>Atet</sup>* (Supplemental  
280 Figure S3).

281 Taken together, these data demonstrate that perturbing MTF tetramerization by  
282 introducing structure-based mutations in SEP3 or in SEP3 and AG has a strong effect on  
283 floral organ differentiation and cell identity in the second, third and fourth whorls, correlating  
284 tetramerization defects characterized *in vitro* with physiological function.

285

## 286 Discussion

287 MIKC<sup>c</sup> MTFs fulfill important roles in plant reproductive development. Evidence  
288 from gymnosperms, angiosperms and ancestral reconstructions of the most recent common  
289 ancestor of extant seed plants suggests that tetramerization of MTFs is likely widespread,  
290 however whether or not tetramerization is required for specifying reproductive organ identity  
291 has been less clear<sup>4,10</sup>. In mammals and fungi, for example, MTFs regulate different  
292 developmental processes via dimer formation, with no higher order MADS oligomerization  
293 states accessible or required for DNA-binding or activity<sup>39,40</sup>. While the addition of the  
294 Keratin-like tetramerization domain occurred early in evolution, with MIKC<sup>c</sup> MTFs even  
295 present in charophyte green algae, defining the physiological role of tetramerization has been  
296 challenging due to the difficulties in fully decoupling DNA binding and  
297 dimerization/tetramerization<sup>11,41</sup>. In addition, *in vitro* studies of MADS tetramerization  
298 mutants have demonstrated robust DNA-binding of MADS homo- and heterodimers, further  
299 raising the question of whether or not tetramer formation is indispensable for physiological  
300 functions<sup>30,31,42</sup>.

301 In angiosperms, B and C class organ identity MADS are not able to tetramerize  
302 directly based on *in vitro* and *in vivo* studies, with tetramerization requiring a SEPALLATA  
303 clade member<sup>42,43</sup>. Over-expression of A, B and C class MADS genes is not sufficient to  
304 confer organ identity, with conversion of leaves to petaloid or stamenoid organs requiring an  
305 E class MADS in addition to A, B and C class<sup>22,25</sup>. However, SEP clade member also

306 heterodimerize promiscuously with A, B and C MTFs, raising the possibility that SEP-  
307 containing MADS heterodimers are the essential complex for specifying organ identity<sup>28</sup>.  
308 Recent studies have further demonstrated that functional identity of MTFs is conferred at least  
309 in part by the dimerization I domain which helps determine MADS protein-protein interaction  
310 and DNA-binding specificity<sup>12</sup>. Combining structure-based mutagenesis, detailed *in vitro*  
311 characterization of oligomerization state, DNA-binding and comparative transgenic studies  
312 allows us to more fully determine the role of MADS tetramer formation in floral organ  
313 development. By progressively mutating the tetramerization interface and examining the  
314 DNA-binding patterns as well as the ability of *SEP3* mutants to complement the homeotic  
315 conversion of second, third and fourth whorl organs to sepals in the triple *sep1 sep2 sep3*  
316 mutant, the role of hetero-dimerisation versus heterotetramerisation of MADS organ identity  
317 complexes can be addressed. Based on the data presented here, second, third and fourth whorl  
318 organ identity requires tetramer formation of MTF complexes. While dimeric MADS  
319 complexes are able to strongly bind DNA *in vitro* and *in vivo* based on band shift assays, seq-  
320 DAP-seq and ChIP-seq experiments, this is not sufficient for proper gene regulation in the  
321 context of organ identity specification.

322 A key outstanding question is the underlying molecular mechanism of gene regulation  
323 by MADS tetrameric complexes. *SEP3/AG* wildtype complexes show an enrichment in 36, 46  
324 and 56 base pair intersite spacing due to concurrent two-site binding of DNA by tetrameric  
325 complexes, with these distances present in genes important for meristem determinacy. Seq-  
326 DAP-seq studies demonstrate the loss of intersite spacing even for the weakly impaired  
327 *SEP3<sup>Atet</sup>/AG* tetramerization mutant, whose expression *in planta* led to an indeterminacy  
328 phenotype, correlating well with changes in regulation of genes such as *KNU* but no defects in  
329 second or third whorl organ specification and only limited defects in fourth whorl organ  
330 identity<sup>30</sup>. Importantly, however, examination of the genome-wide binding by the strong  
331 *SEP3<sup>Atet3M</sup>/AG* and *SEP3<sup>Atet3M</sup>/AG<sup>Atet</sup>* tetramerization mutants in this study demonstrates the  
332 reduction in DNA-binding most strongly affects binding sites in regions enriched for specific  
333 intersite distances. These regions contain putatively relevant genes involved in organ  
334 development including *KAN2*, *JAG* and *INO*. Expression of strong *SEP3* and *AG*  
335 tetramerization mutants *in planta* results in much more pronounced floral organ defects in  
336 addition to the indeterminacy phenotype observed for *SEP3<sup>Atet</sup>*-expressing plants. This may  
337 indicate that the experimental conditions of seq-DAP-seq are underestimating the ability of  
338 the *SEP3<sup>Atet</sup>/AG* complex to weakly tetramerize or that dimer binding, even to relatively poor  
339 binding sites that may require co-operativity *in vivo*, are detected in seq-DAP-seq, masking

340 changes in binding at loci important for organ identity specification. In addition, an important  
341 limitation to seq-DAP-seq experiments is the use of naked DNA to examine binding patterns,  
342 thus neglecting the chromatin landscape, which plays a critical role in gene regulation. Recent  
343 studies have sought to address the challenge of deciphering the role of chromatin architecture  
344 in MTF gene regulation. *In vitro* and *in vivo* experiments for AP1 have shown that  
345 tetramerization of AP1 strengthens binding to CArG boxes on nucleosomal DNA and  
346 tetramer formation may be required for efficient displacement of histones for clustered  
347 MADS binding sites. Thus, optimized intersite spacing and nucleosome positioning may both  
348 be key to why tetramerization of MTFs is required *in vivo* for launching floral organ identity  
349 programs.

350 Taken together, the structural, *in vitro* and *in vivo* experiments presented here  
351 demonstrate the critical importance of MADS tetramer formation in floral organ identity in  
352 the second, third and fourth whorls, in addition to the previously described importance of  
353 tetramerization in floral meristem determinacy<sup>30</sup>. Interestingly, MIKC<sup>c</sup> MTFs are present in  
354 non-seed plants including algae, mosses and ferns which implies that tetramerization may  
355 have occurred early in evolution and may be required for gene regulation for all MIKC<sup>c</sup> MTFs  
356 in the green lineage, although this remains to be determined. Further studies examining the  
357 role of oligomerization and mechanisms of gene regulation in diverse species by MADS  
358 complexes will shed light on how this TF family has evolved central and diverse roles in  
359 development from algae to land plants.

360

## 361 **Materials and Methods**

362

### 363 **Plant material and growth conditions**

364 All experiments were performed using *Arabidopsis thaliana* WT and MADS mutants  
365 in the Col-0 background. The *ag-4* mutant, originally generated in the Ler background,<sup>44</sup> was  
366 back-crossed 5 times in the Col-0 ecotype. The *ag-4* mutant expresses two variants of AG  
367 carrying deletion of 12 or 14 amino acids in the tetramerization interface, due to a splicing  
368 site mutation<sup>44</sup>. Seedlings were grown in controlled growth chambers in long day conditions  
369 (16h light/8h dark) at 22°C for plant transformation and phenotype analysis.

370

### 371 **Plasmid construction for *sep1 sep2 sep3* and plant complementation analysis**

372 The originally generated *sep1 sep2 sep3*, containing a T-DNA insertion in *SEP1* and  
373 an unstable transposon insertion in *SEP2* and *SEP3*<sup>21</sup>, was replaced in this study by a stable

374 mutant generated using CRISPR-Cas9 genome editing to delete portions of the *SEP2* and  
375 *SEP3* genes. To generate a stable null mutation in *SEP2*, two guide RNA (gRNA) sequences  
376 were designed with no off targets using CHOPCHOP<sup>45</sup>. The two gRNA sequences were first  
377 cloned in pATU26:U26gRNA vectors and finally inserted into pCAMBIA together with the  
378 cassette containing the Cas9 sequence from pBSK:pUBQ10:CoCas9<sup>46</sup> and transformed into  
379 *Agrobacterium tumefaciens*. The generated *sep2* mutant carries a deletion of 795 bp starting at  
380 +6 in exon 1 and removing the first 16 bp of exon 2, resulting in a frame shift. A similar  
381 strategy was followed to generate two *sep3* alleles. The first *sep3* mutant (*sep3-3*) carries a  
382 1081 bp deletion removing the last 38 bp of intron 1 up to the first 83 bp of exon 8. The  
383 second generated *sep3* mutant, named *sep3-4*, carries a deletion of 963 bp starting from +25  
384 in exon 1. Sequences for generating gRNA are presented in Table SII. Sequences of *sep2* and  
385 *sep3* at the site of deletion are provided in Table SIII. The triple *sep1 sep2 sep3* mutants were  
386 generated by crosses. The newly generated mutants have the same flower phenotype of the  
387 previously described triple *sep1 sep2 sep3* transposon mutant, with sepaloid organs in all  
388 whorls and flower indeterminacy<sup>21</sup>.

389 For the complementation analysis, p*SEP3::SEP3* (ABRC stock number CD3-2708)  
390 and p*SEP3::SEP3<sup>Atet</sup>* (ABRC stock number CD3-2709) were used. p*SEP3::SEP3<sup>Atet3M</sup>* was  
391 constructed as described for the above plasmids using PCR amplified specific sequence of  
392 *SEP3<sup>Atet3M</sup>* cloned into pSP64. These three plasmids allow the expression of *SEP3*, *SEP3<sup>Atet</sup>*  
393 and *SEP3<sup>Atet3M</sup>* under the control of the *SEP3* promoter and contain the *SEP3* regulatory intron  
394 1 sequence cloned between exon 1 and 2, as described previously<sup>30</sup>. The vector backbone,  
395 pFP100, allows GFP expression in seeds for selection of transformants<sup>47</sup>.

396

### 397 **Plant transformation and floral phenotype analysis**

398 For the generation of *sep1 sep2 sep3* expressing *SEP3*, *SEP3<sup>Atet</sup>* and *SEP3<sup>Atet3M</sup>*,  
399 heterozygous *sep1 sep2 sep3-3<sup>+/-</sup>* plants were transformed with the p*SEP3::SEP3*,  
400 p*SEP3::SEP3<sup>Atet</sup>*, and p*SEP3::SEP3<sup>Atet3M</sup>* using the floral dip method<sup>48</sup>. Transformants were  
401 selected based on the fluorescence of GFP-positive seeds. For the generation of *sep1 sep2*  
402 *sep3 ag-4* expressing *SEP3<sup>Atet</sup>*, *sep1 sep2* was crossed with the *ag-4* mutant to generate the  
403 *sep1 sep2 ag-4<sup>+/-</sup>* mutant. Pollen from *sep1 sep2 sep3-3* plants expressing *SEP3<sup>Atet</sup>* was used to  
404 fertilize *sep1 sep2 ag-4<sup>+/-</sup>* and *sep1 sep2 sep3-3<sup>+/-</sup> ag-4<sup>+/-</sup>* plants expressing *SEP3<sup>Atet</sup>* could be  
405 genotyped after crossing. Manual self-fertilization of these plants generated *sep1 sep2 sep3-3*  
406 *ag-4* (named *sep1 sep2 sep3 ag-4* for simplicity) expressing *SEP3<sup>Atet</sup>* in the next generation.  
407 All the primers used for plant genotyping are listed in Table SII.

408 Floral phenotypic analyses were performed by light microscopy on flower numbers  
409 10–19 based on their order of emergence on T1 plants genotyped *sep1 sep2 sep3* expressing  
410 *SEP3* (3 T1), *SEP3<sup>Atet</sup>* (2 T1) and *SEP3<sup>Atet3M</sup>* (5 T1), on control untransformed *sep1 sep2 sep3*  
411 plants, and on *sep1 sep2 sep3 ag-4* expressing *SEP3<sup>Atet</sup>* (1 line) and *sep1 sep2 sep3<sup>+/-</sup> ag-4*  
412 expressing *SEP3<sup>Atet</sup>* (7 lines). In Figure 4, black squares were added to mask magnification  
413 and scale marks automatically generated by the software and appropriate scale bars were  
414 added manually in white for clarity.

415

#### 416 **Environmental scanning electron microscopy**

417 Scanning electron microscopy (SEM) experiments were performed at the Electron  
418 Microscopy Facility of the Institut de Chimie Moléculaire of Grenoble Nanobio-Chemistry  
419 Platform, as previously described<sup>12</sup>. Untreated flowers were directly placed in the microscope  
420 chamber. Care was taken to maintain humidity during the pressure decrease in the chamber in  
421 order to prevent tissue drying. Secondary electron images were recorded with a Quanta FEG  
422 250 (FEI) microscope while maintaining the tissue at 2 °C, under a pressure of 500 Pa and a  
423 70% relative humidity. The accelerating voltage was 14 kV and the image magnification  
424 ranged from 100 to 800Å. Flowers from three independent lines were observed for each  
425 genotype.

426

#### 427 **SEP3-AG K domain construct, protein expression and purification.**

428 The SEP3 K domain corresponding to residues 75-178 was PCR amplified and  
429 inserted by Gibson assembly to the NcoI/HindIII linearized pETDuet vector to generate the  
430 pETDuet-SEP3<sup>75-178</sup> construct. A Tobacco Etch Virus (TEV) cleavable 6x histidine-maltose  
431 binding protein (His-MBP) tag amplified from the pETM-41 vector followed by the region  
432 corresponding to AG<sup>90-189</sup> K domain with an additional TEV cleavage site at the C terminus,  
433 were inserted into the pETDuet -SEP3<sup>75-178</sup> linearized by NdeI, using Gibson assembly to  
434 create the pETDuet SEP3<sup>75-178</sup> /AG<sup>90-189</sup> construct. Primers are listed in Table SII. *E. coli*  
435 BL21 Rosetta 2 (Novagen) were transformed with the pETDuet SEP3<sup>75-178</sup> /AG<sup>90-189</sup> construct  
436 and grown either in LB or minimal medium containing selenomethionine as described<sup>49</sup>.  
437 Cells were grown at 37 °C to an OD600 of 0.6–0.8 after which time the temperature was  
438 reduced to 18 °C and protein expression induced by addition of 1 mM of isopropyl-β-D-1-  
439 thiogalactoside for 12 h. Cells were harvested by centrifugation and the cell pellet  
440 resuspended in lysis buffer, 50 mM Tris-HCl pH 7.5, 300 mM NaCl, 1 mM tris(2-  
441 carboxyethyl)phosphine (TCEP), supplemented with 1x complete protease inhibitors (Roche).

442 Cells were lysed by sonication and cell debris pelleted at 25,000 rpm for 40 min. The soluble  
443 fraction was applied to a 1 ml Ni-NTA column, washed with lysis buffer + 10 mM imidazole  
444 and the protein eluted with lysis buffer + 250 mM imidazole. Cleavage of the His-MBP tag  
445 was carried out overnight at 4°C during dialysis against Tris-HCl 50 mM pH 7.5, 300 mM  
446 NaCl, 1 mM TCEP in the presence of 1:100 (w:w) His-tagged TEV protease. The protein was  
447 then passed over a Ni-NTA column to deplete the TEV and any uncleaved protein. SEP3<sup>75-178</sup>  
448 /AG<sup>90-189</sup> complex was further purified by gel filtration using a Superdex 200 10/300 column  
449 (GE Healthcare). The protein complex was concentrated to 6-8 mg/ml and used for  
450 crystallization trials.

451

#### 452 **Protein crystallization, data collection and refinement.**

453 SEP3<sup>75-178</sup> /AG<sup>90-189</sup> at a concentration of 6-8 mg/ml was mixed at a 1:1 ratio with  
454 Tris-HCl 100 mM pH 8 and 2 M sodium formate. The protein crystallized after 3 days at 4 °C  
455 forming rectangle shaped single crystals. Seleno-methionine derivatized crystals were  
456 obtained after seeding with WT crystals. Glycerol was added to the drop to ~20% final  
457 concentration as cryoprotectant and the crystals were then flash frozen in N<sub>2(l)</sub>. Diffraction  
458 data were collected at 100 K at the European Synchrotron Radiation Facility, Grenoble,  
459 France, on ID23-2 at a wavelength of 0.873 Å. Indexing was performed using MXCube<sup>50</sup> and  
460 the default optimized oscillation range and collection parameters used for data collection. All  
461 datasets were integrated and scaled using the programs XDS and XSCALE<sup>51</sup>. For seleno-  
462 methionine containing crystals, 6 SeMet data sets were collected from three crystals. Data  
463 were automatically processed by XDS within the Grenades pipeline<sup>52</sup> and submitted to  
464 CODGAS<sup>53</sup> to group isomorphous datasets. This identified two datasets from the same crystal  
465 which were merged and analyzed by SIRAS using the CRANK2<sup>54</sup> phasing program.  
466 Diffraction images and XDS input files have been deposited at Zenodo (). The partial model  
467 from CRANK2 was used for molecular replacement of the native dataset with Phaser<sup>55</sup>.  
468 Model building was performed using Coot<sup>56</sup> and all refinements were carried out in Refmac<sup>57</sup>.  
469 The structure quality was assessed using MolProbity<sup>58</sup>. Data collection and refinement  
470 statistics are given in Table 1. The structure is deposited under PDB 8CRA.

471

#### 472 **Plasmid construction and EMSA experiments**

473 Vectors containing *AG* (At4g18960.1), *SEP3* (At1g24260.2), *SEP3<sup>Atet</sup>* (At1g24260.3),  
474 *AP3* (At3g54340) and *PI* (At5g20240) cDNAs were used as previously described<sup>30</sup>. *API*  
475 (AT1G69120) cDNA was PCR-amplified using specific primers and inserted into

476 XbaI/BamHI digested pSP64 (Promega) vector. Coding sequences for  $SEP3^{\Delta tet3M}$  and  $AG^{\Delta tet}$   
477 were generated using the QuikChange (Agilent) protocol according to the manufacturer's  
478 instructions and cloned into pSP64 vector as described for *API*. Primers used to generate the  
479 vectors are listed in Table SII. These vectors were used for *in vitro* protein production using  
480 SP6 High-Yield Wheat Germ Protein Expression System (Promega L3260) according to the  
481 manufacturer's instructions. Electrophoretic mobility shift assay (EMSA) were performed as  
482 described<sup>30</sup>. The 103-bp DNA probe from the *SEP3* promoter<sup>30</sup> containing two CARG box  
483 binding sites was labeled with Cy5 (Eurofins). For each EMSA, a negative control was run  
484 corresponding to labelled DNA incubated with *in vitro* transcription translation mix and  
485 empty pSP64 vector.

486

### 487 **Plasmid construction and seq-DAP-seq experiments**

488 For seq-DAP-seq experiments, the following C-terminal-tagged constructs were  
489 generated using Gibson assembly and PCR amplified: pTnT- $SEP3^{\Delta tet3M}$ -3FLAG and pTnT-  
490  $AG^{\Delta tet}$ -5Myc as described<sup>31</sup>. pTnT-*SEP3*-3FLAG, pTnT- $SEP3^{\Delta tet}$ -3FLAG, pTnT-*AG*-5Myc are  
491 reported previously<sup>31</sup>. Seq-DAP-seq for  $SEP3^{\Delta tet3M}$ -AG complex and  $SEP3^{\Delta tet}$ -AG <sup>$\Delta tet$</sup>  complex  
492 was performed as described previously<sup>12,31</sup>. Briefly, 2  $\mu$ g of each purified plasmid was used as  
493 input in a 50  $\mu$ l TnT (Promega) reaction incubated at 25 °C for 2 h. The reaction solution was  
494 then combined with 50  $\mu$ l IP buffer (PBS supplemented with 0.005% NP40 and proteinase  
495 inhibitors (Roche)) and mixed with 20  $\mu$ l anti-FLAG magnetic beads (Merck Millipore  
496 M8823). Following 1 h incubation at room temperature, the anti-FLAG magnetic beads were  
497 immobilized, and washed three times with 100  $\mu$ l IP buffer. TF complexes were eluted with  
498 100  $\mu$ l IP buffer supplemented with 200  $\mu$ g/ml 3xFLAG peptide (Merck Millipore F4799).  
499 The eluted protein was then immobilized on anti-c-Myc magnetic beads (Thermo Fisher  
500 88843) and washed three times with 100  $\mu$ l IP buffer to isolate homogeneous  $SEP3^{\Delta tet3M}$ -AG  
501 or  $SEP3^{\Delta tet}$ -AG <sup>$\Delta tet$</sup>  complexes. The purified protein complexes, while still bound on anti-c-  
502 Myc magnetic beads, were incubated with 50 ng DAP-seq input library pre-ligated with  
503 Illumina adaptor sequences. The reaction was incubated for 90 min, and then washed six  
504 times using 100  $\mu$ l IP buffer. The bound DNA was heated to 98 °C for 10 min and eluted in  
505 30  $\mu$ l EB buffer (10 mM Tris-Cl, pH 8.5). The eluted DNA fragments were PCR amplified  
506 using Illumina TruSeq primers for 20 cycles, and purified by AMPure XP beads (Beckman).  
507 The libraries were quantified by qPCR, pooled and sequenced on Illumina HiSeq (Genewiz)  
508 with specification of pairedend sequencing of 150 cycles. Each library obtained 10–20 million  
509 reads. The seq-DAP-seq was performed in triplicate.

510

### 511 **Seq-DAP-seq data analysis**

512 For each seq-DAP-seq samples, reads were checked using FastQC<sup>59</sup> and adaptor  
513 sequences removed with NGmerge<sup>60</sup> and mapped with bowtie<sup>61</sup> onto the TAIR10 version of  
514 the *A. thaliana* genome (<https://www.arabidopsis.org>), devoid of the mitochondrial and the  
515 chloroplast genomes. The duplicated reads were removed using the samtools rmdup  
516 program<sup>62</sup>. The resulting alignment files were used to derive the binding intensity of each  
517 complex at 6347 regions bound by the SEP3/AG complex<sup>31</sup>. The binding intensity of a given  
518 complex at bound regions was computed as the normalized reads coverage, averaged across  
519 replicates, and expressed as reads per kilobase per million mapped reads (RPKM). To limit  
520 the bias due to differences in the signal-to-noise ratio between seq-DAP-seq samples (Table  
521 SIV), the per-million scaling factor was done with the total number of reads mapped in peaks  
522 instead of all mapped reads. We made this choice over the classical normalization with all  
523 mapped reads because normalizing by total mapped reads flattens the signal for SEP3<sup>Δtet</sup>/AG  
524 and SEP3<sup>Δtet3M</sup>/AG (samples for these two conditions have the lowest fraction of reads in  
525 peaks (FRiP) values, Table SIII)<sup>12,63</sup>. This artificially makes SEP3<sup>Δtet</sup>/AG<sup>Δtet</sup> more similar to  
526 SEP3-AG. This choice assumes that differences in FRiP values are due to differential DAP-  
527 seq efficiency. The coverage fold reduction (CFR) was computed as the ratio between the  
528 mean normalized coverage of a complex relative to that of another complex. A SEP3/AG  
529 position weight matrix was used to search CARG boxes in the 6,367 bound sequences and  
530 subsequences with score > -9 were retained. This was used to separate regions harboring a  
531 preferred spacing from regions with no preferred spacing in figure 3B.

### 532 **Chip-seq experiments and data analysis**

533 *sep1 sep2 sep3-4* lines expressing either wildtype *SEP3* or the tetramerization  
534 deficient, *SEP3*<sup>Δtet</sup> were used to conduct chromatin immunoprecipitation experiments  
535 according to previously published protocols<sup>64</sup>. Briefly, 1 g inflorescence (flower stage 1-12)  
536 were collected from 4–5-week-old plants. The tissue was fixed for 30 min and the  
537 immunoprecipitation performed using a SEP3-specific antibody followed by library  
538 preparation using ThruPLEX DNA-Seq Kit (Takara) and deep sequencing<sup>65,66</sup>. Experiments  
539 were done with two biological replicates and the control sample was generated using pre-  
540 immune serum. The two lines were grown in parallel and genotyped (see primer Table SII)  
541 prior to sample collection. For each ChIP-seq data, reads were checked as described in the



542 DAP-Seq data analysis section. Peaks were identified using MACS2<sup>67</sup> and merged using  
543 MSPC<sup>68</sup>, resulting in 4,369 unique regions. The binding intensity of a given complex at bound  
544 regions was computed as the normalized reads coverage, averaged across replicates, and  
545 expressed as reads per kilo per million (RPKM).

546

#### 547 **RNA-seq experiments and data analysis**

548 Total RNA were extracted from two independent lines for *sep1 sep2 sep3* expressing  
549 *SEP3* and three independent lines for *sep1 sep2 sep3* expressing *SEP3<sup>Atet</sup>*, and in duplicate  
550 from *sep1 sep2* and *sep1 sep2 sep3* lines, with lines as described<sup>30</sup>. All the plants were  
551 grown in parallel. Quality of the total RNA was validated by their 260/280 absorbance ratio  
552 and the integrity of the ribosomal RNA by agarose gel. RNA libraries construction and  
553 sequencing were performed by GENEWIZ (USA) using Illumina HiSeq and 2 °ø 150bp  
554 configuration as described<sup>31</sup>. Between 25 and 35 million reads were obtained for each library.  
555 Mapping onto the Arabidopsis genome (TAIR10), read count per gene and statistical analysis  
556 were done using STAR (no multimapping, mismatch number < 10), FeatureCount (default  
557 parameters) and EdgeR (default parameters), respectively, available in the Galaxy  
558 platform<sup>69,70</sup>. Genes were considered differentially expressed (DE) between two genotypes  
559 when the log FC was > 1 or <- 1 and the FDR value < 0.05. DE genes were determined for  
560 *sep1 sep2 sep3* expressing *SEP3<sup>Atet</sup>* versus *sep1 sep2 sep3* and *sep1 sep2 sep3* expressing  
561 *SEP3* vs *sep1 sep2 sep3* expressing *SEP3<sup>Atet</sup>*. DE genes were previously determined for *sep1*  
562 *sep2 sep3* vs *sep1sep2* and *sep1 sep2 sep3* expressing *SEP3* vs *sep1 sep2 sep3*<sup>31</sup>.

563

#### 564 **Data availability**

565 Crystallographic data have been deposited with the PDB under the code 8CRA. RNA-seq,  
566 ChIP-seq and seq-Dap-Seq datasets have been deposited in the GEO database and can be  
567 download with the following tokens: ylszyocitlabxcx (RNA-seq), mrcicesndczrod (ChIP-seq)  
568 and clwncugebvmlrud (seq-DAP-seq).

569

#### 570 **Funding**

571 This project received support from the Agence National de la Recherche (ANR-16-CE92-  
572 0023) and GRAL, a program from the Chemistry and Biology Health Graduate School of the  
573 University Grenoble Alpes (ANR-17-EURE-0003), with a thesis fellowship to AJ. The X-ray  
574 diffraction experiments were performed on beamline ID23-2 at the European Synchrotron  
575 Radiation Facility (ESRF), Grenoble, France. This work used the platforms of the Grenoble

576 Instruct-ERIC center (ISBG; UAR 3518 CNRS-CEA-UGA-EMBL) within the Grenoble  
577 Partnership for Structural Biology (PSB), supported by FRISBI (ANR-10-INBS-0005-02).  
578 The research leading to these results has received funding from the European Community's  
579 Seventh Framework Programme H2020 under iNEXT Discovery (project number 871037).

580

#### 581 **Author contributions**

582 V.H. and C.Z. conceived the study. V.H, C.Z and K.K. designed experiments. V.H., X.L.,  
583 M.P., A.J., A.G., X.X., W.Y. performed the experiments. C.Z. and M.N. solved the 3D  
584 structure. R.B.-M, J.L., K.K. and F.P. analyzed the genome wide data. C.Z. and V.H. wrote  
585 the manuscript with the help of all authors.

586

#### 587 **Acknowledgment:**

588 We thank Franck Wellmer (Smurfit Institute of Genetics, Dublin, Ireland) for providing the  
589 original *ag-4* mutant. The authors thank the NanoBio- ICMG Platform (UAR 2607, Grenoble)  
590 for granting access to the Electron Microscopy facility.

591

#### 592 **Table 1. Data collection and refinement statistics**

593

|                                                          | SEP3-AG              |
|----------------------------------------------------------|----------------------|
| <b>Data collection</b>                                   |                      |
| Space group                                              | C222 <sub>1</sub>    |
| Cell dimensions                                          |                      |
| <i>a, b, c</i> (Å)                                       | 101.3, 138.4, 180.2  |
| $\alpha, \beta, \gamma$ (°)                              | 90, 90, 90           |
| Resolution (Å)                                           | 82.-2.4 (2.45-2.40)* |
| <i>R</i> <sub>sym</sub> or <i>R</i> <sub>merge</sub> (%) | 9.7 (163)            |
| <i>I</i> / $\sigma$ <i>I</i>                             | 11.3 (0.9)           |
| Completeness (%)                                         | 99.3 (93.2)          |
| Redundancy                                               | 3.8 (3.7)            |
| CC(1/2)                                                  | 99.9 (34.7)          |
| <b>Refinement</b>                                        |                      |
| Resolution (Å)                                           | 20.-2.4 (2.45-2.4)   |
| No. reflections                                          | 46989                |
| <i>R</i> <sub>work</sub> / <i>R</i> <sub>free</sub>      | 23.6/27.9 (33/35)    |
| No. atoms                                                | 6175                 |
| Protein                                                  | 6160                 |
| Water                                                    | 115                  |
| Other ligands                                            | -                    |
| <i>B</i> -factors                                        |                      |
| Protein                                                  | 82                   |

---

|                   |       |
|-------------------|-------|
| Water             | 66    |
| Other ligands     | -     |
| R.m.s. deviations |       |
| Bond lengths (Å)  | 0.007 |
| Bond angles (°)   | 1.48  |

---

594 \* **refers to the highest resolution shell**

595

596

## 597 **References**

- 598 1. Becker, A., Saedler, H. & Theissen, G. Distinct MADS-box gene expression patterns in  
599 the reproductive cones of the gymnosperm *Gnetum gnemon*. *Dev Genes Evol* **213**, 567–  
600 72 (2003).
- 601 2. Melzer, R., Wang, Y. Q. & Theissen, G. The naked and the dead: the ABCs of  
602 gymnosperm reproduction and the origin of the angiosperm flower. *Semin Cell Dev Biol*  
603 **21**, 118–28 (2010).
- 604 3. Shindo, S., Ito, M., Ueda, K., Kato, M. & Hasebe, M. Characterization of MADS genes in  
605 the gymnosperm *Gnetum parvifolium* and its implication on the evolution of reproductive  
606 organs in seed plants. *Evol. Dev.* **1**, 180–190 (1999).
- 607 4. Wang, Y. Q., Melzer, R. & Theissen, G. Molecular interactions of orthologues of floral  
608 homeotic proteins from the gymnosperm *Gnetum gnemon* provide a clue to the  
609 evolutionary origin of ‘floral quartets’. *Plant J* **64**, 177–90 (2010).
- 610 5. Theissen, G. & Saedler, H. Plant biology. Floral quartets. *Nature* **409**, 469–71 (2001).
- 611 6. Uimari, A. *et al.* Integration of reproductive meristem fates by a SEPALLATA-like  
612 MADS-box gene. *Proc. Natl. Acad. Sci.* **101**, 15817–15822 (2004).
- 613 7. Dreni, L. & Ferrández, C. Tracing the Evolution of the SEPALLATA Subfamily across  
614 Angiosperms Associated with Neo- and Sub-Functionalization for Reproductive and  
615 Agronomically Relevant Traits. *Plants* **11**, 2934 (2022).
- 616 8. Morel, P. *et al.* Divergent Functional Diversification Patterns in the SEP/AGL6/AP1  
617 MADS-Box Transcription Factor Superclade. *Plant Cell* **31**, 3033–3056 (2019).

- 618 9. Coen, E. S. & Meyerowitz, E. M. The war of the whorls: genetic interactions controlling  
619 flower development. *Nature* **353**, 31–7 (1991).
- 620 10. Ruelens, P. *et al.* The Origin of Floral Organ Identity Quartets. *Plant Cell* **29**, 229–242  
621 (2017).
- 622 11. Kaufmann, K., Melzer, R. & Theissen, G. MIKC-type MADS-domain proteins: structural  
623 modularity, protein interactions and network evolution in land plants. *Gene* **347**, 183–98  
624 (2005).
- 625 12. Lai, X. *et al.* The intervening domain is required for DNA-binding and functional identity  
626 of plant MADS transcription factors. *Nat. Commun.* **12**, 4760 (2021).
- 627 13. Kwantes, M., Liebsch, D. & Verelst, W. How MIKC\* MADS-box genes originated and  
628 evidence for their conserved function throughout the evolution of vascular plant  
629 gametophytes. *Mol Biol Evol* **29**, 293–302 (2012).
- 630 14. Rümpler, F. *et al.* The origin of floral quartet formation - Ancient exon duplications  
631 shaped the evolution of MIKC-type MADS-domain transcription factor interactions.  
632 2022.12.23.521771 Preprint at <https://doi.org/10.1101/2022.12.23.521771> (2022).
- 633 15. Theissen, G. Development of floral organ identity: stories from the MADS house. *Curr*  
634 *Opin Plant Biol* **4**, 75–85 (2001).
- 635 16. Zahn, L. M. *et al.* The evolution of the SEPALLATA subfamily of MADS-box genes: a  
636 preangiosperm origin with multiple duplications throughout angiosperm history. *Genetics*  
637 **169**, 2209–23 (2005).
- 638 17. Melzer, R. *et al.* DEF- and GLO-like proteins may have lost most of their interaction  
639 partners during angiosperm evolution. *Ann Bot* **114**, 1431–43 (2014).
- 640 18. Melzer, R. & Theissen, G. Reconstitution of ‘floral quartets’ in vitro involving class B  
641 and class E floral homeotic proteins. *Nucleic Acids Res* **37**, 2723–36 (2009).

- 642 19. Smaczniak, C. *et al.* Characterization of MADS-domain transcription factor complexes in  
643 *Arabidopsis* flower development. *Proc Natl Acad Sci U A* **109**, 1560–5 (2012).
- 644 20. Egea-Cortines, M., Saedler, H. & Sommer, H. Ternary complex formation between the  
645 MADS-box proteins SQUAMOSA, DEFICIENS and GLOBOSA is involved in the  
646 control of floral architecture in *Antirrhinum majus*. *EMBO J* **18**, 5370–9 (1999).
- 647 21. Pelaz, S., Tapia-Lopez, R., Alvarez-Buylla, E. R. & Yanofsky, M. F. Conversion of  
648 leaves into petals in *Arabidopsis*. *Curr Biol* **11**, 182–4 (2001).
- 649 22. Pelaz, S., Ditta, G. S., Baumann, E., Wisman, E. & Yanofsky, M. F. B and C floral organ  
650 identity functions require SEPALLATA MADS-box genes. *Nature* **405**, 200–3 (2000).
- 651 23. Ditta, G., Pinyopich, A., Robles, P., Pelaz, S. & Yanofsky, M. F. The SEP4 gene of  
652 *Arabidopsis thaliana* functions in floral organ and meristem identity. *Curr Biol* **14**, 1935–  
653 40 (2004).
- 654 24. Goto, K., Kyojuka, J. & Bowman, J. L. Turning floral organs into leaves, leaves into  
655 floral organs. *Curr Opin Genet Dev* **11**, 449–56 (2001).
- 656 25. Honma, T. & Goto, K. Complexes of MADS-box proteins are sufficient to convert leaves  
657 into floral organs. *Nature* **409**, 525–9 (2001).
- 658 26. Mendes, M. A. *et al.* MADS domain transcription factors mediate short-range DNA  
659 looping that is essential for target gene expression in *Arabidopsis*. *Plant Cell* **25**, 2560–72  
660 (2013).
- 661 27. Jetha, K., Theissen, G. & Melzer, R. *Arabidopsis* SEPALLATA proteins differ in  
662 cooperative DNA-binding during the formation of floral quartet-like complexes. *Nucleic*  
663 *Acids Res* **42**, 10927–42 (2014).
- 664 28. Immink, R. G. *et al.* SEPALLATA3: the ‘glue’ for MADS box transcription factor  
665 complex formation. *Genome Biol* **10**, R24 (2009).

- 666 29. Puranik, S. *et al.* Structural basis for the oligomerization of the MADS domain  
667 transcription factor SEPALLATA3 in Arabidopsis. *Plant Cell* **26**, 3603–15 (2014).
- 668 30. Hugouvieux, V. *et al.* Tetramerization of MADS family transcription factors  
669 SEPALLATA3 and AGAMOUS is required for floral meristem determinacy in  
670 Arabidopsis. *Nucleic Acids Res* **46**, 4966–4977 (2018).
- 671 31. Lai, X. *et al.* Genome-wide binding of SEPALLATA3 and AGAMOUS complexes  
672 determined by sequential DNA-affinity purification sequencing. *Nucleic Acids Res.* **48**,  
673 9637–9648 (2020).
- 674 32. Chojnowski, G., Pereira, J. & Lamzin, V. S. Sequence assignment for low-resolution  
675 modelling of protein crystal structures. *Acta Crystallogr. Sect. Struct. Biol.* **75**, 753–763  
676 (2019).
- 677 33. McAbee, J. M. *et al.* ABERRANT TESTA SHAPE encodes a KANADI family member,  
678 linking polarity determination to separation and growth of Arabidopsis ovule integuments.  
679 *Plant J.* **46**, 522–531 (2006).
- 680 34. Eshed, Y., Baum, S. F., Perea, J. V. & Bowman, J. L. Establishment of polarity in lateral  
681 organs of plants. *Curr. Biol. CB* **11**, 1251–1260 (2001).
- 682 35. Dinneny, J. R., Yadegari, R., Fischer, R. L., Yanofsky, M. F. & Weigel, D. The role of  
683 JAGGED in shaping lateral organs. *Development* **131**, 1101–10 (2004).
- 684 36. Dinneny, J. R., Weigel, D. & Yanofsky, M. F. NUBBIN and JAGGED define stamen and  
685 carpel shape in Arabidopsis. *Development* **133**, 1645–55 (2006).
- 686 37. Skinner, D. J., Dang, T. & Gasser, C. S. The Arabidopsis INNER NO OUTER (INO)  
687 gene acts exclusively and quantitatively in regulation of ovule outer integument  
688 development. *Plant Direct* **7**, e485 (2023).
- 689 38. Yanofsky, M. F. *et al.* The protein encoded by the Arabidopsis homeotic gene *agamous*  
690 resembles transcription factors. *Nature* **346**, 35–9 (1990).

- 691 39. Pellegrini, L., Tan, S. & Richmond, T. J. Structure of serum response factor core bound to  
692 DNA. *Nature* **376**, 490–8 (1995).
- 693 40. Tan, S. & Richmond, T. J. Crystal structure of the yeast MATalpha2/MCM1/DNA ternary  
694 complex. *Nature* **391**, 660–6 (1998).
- 695 41. Gramzow, L. & Theissen, G. A hitchhiker’s guide to the MADS world of plants. *Genome*  
696 *Biol* **11**, 214 (2010).
- 697 42. Rumpler, F., Theissen, G. & Melzer, R. A conserved leucine zipper-like motif accounts  
698 for strong tetramerization capabilities of SEPALLATA-like MADS-domain transcription  
699 factors. *J Exp Bot* **69**, 1943–1954 (2018).
- 700 43. Hugouvieux, V. & Zubieta, C. MADS transcription factors cooperate: complexities of  
701 complex formation. *J Exp Bot* **69**, 1821–1823 (2018).
- 702 44. Sieburth, L. E., Running, M. P. & Meyerowitz, E. M. Genetic separation of third and  
703 fourth whorl functions of AGAMOUS. *Plant Cell* **7**, 1249–58 (1995).
- 704 45. CHOPCHOP v3: expanding the CRISPR web toolbox beyond genome editing | Nucleic  
705 Acids Research | Oxford Academic. [https://academic-oup-](https://academic-oup-com.insb.bib.cnrs.fr/nar/article/47/W1/W171/5491735)  
706 [com.insb.bib.cnrs.fr/nar/article/47/W1/W171/5491735](https://academic-oup-com.insb.bib.cnrs.fr/nar/article/47/W1/W171/5491735).
- 707 46. Yan, W., Chen, D. & Kaufmann, K. Efficient multiplex mutagenesis by RNA-guided  
708 Cas9 and its use in the characterization of regulatory elements in the AGAMOUS gene.  
709 *Plant Methods* **12**, 23 (2016).
- 710 47. Bensmihen, S. *et al.* Analysis of an activated ABI5 allele using a new selection method  
711 for transgenic Arabidopsis seeds. *FEBS Lett* **561**, 127–31 (2004).
- 712 48. Clough, S. J. & Bent, A. F. Floral dip: a simplified method for Agrobacterium-mediated  
713 transformation of Arabidopsis thaliana. *Plant J. Cell Mol. Biol.* **16**, 735–743 (1998).
- 714 49. Doublet, S. Production of selenomethionyl proteins in prokaryotic and eukaryotic  
715 expression systems. *Methods Mol Biol* **363**, 91–108 (2007).

- 716 50. Gabadinho, J. *et al.* MxCuBE: a synchrotron beamline control environment customized  
717 for macromolecular crystallography experiments. *J Synchrotron Radiat* **17**, 700–7 (2010).
- 718 51. Kabsch, W. Xds. *Acta Crystallogr Biol Crystallogr* **66**, 125–32 (2010).
- 719 52. Monaco, S. *et al.* Automatic processing of macromolecular crystallography X-ray  
720 diffraction data at the ESRF. *J. Appl. Crystallogr.* **46**, 804–810 (2013).
- 721 53. Zander, U. *et al.* Merging of synchrotron serial crystallographic data by a genetic  
722 algorithm. *Acta Crystallogr Struct Biol* **72**, 1026–35 (2016).
- 723 54. Skubák, P. *et al.* A new MR-SAD algorithm for the automatic building of protein models  
724 from low-resolution X-ray data and a poor starting model. *IUCrJ* **5**, 166–171 (2018).
- 725 55. McCoy, A. J. Solving structures of protein complexes by molecular replacement with  
726 Phaser. *Acta Crystallogr Biol Crystallogr* **63**, 32–41 (2007).
- 727 56. Emsley, P., Lohkamp, B., Scott, W. G. & Cowtan, K. Features and development of Coot.  
728 *Acta Crystallogr Biol Crystallogr* **66**, 486–501 (2010).
- 729 57. Murshudov, G. N., Vagin, A. A. & Dodson, E. J. Refinement of macromolecular  
730 structures by the maximum-likelihood method. *Acta Crystallogr. D Biol. Crystallogr.* **53**,  
731 240–255 (1997).
- 732 58. Williams, C. J. *et al.* MolProbity: More and better reference data for improved all-atom  
733 structure validation. *Protein Sci. Publ. Protein Soc.* **27**, 293–315 (2018).
- 734 59. Andrews, S. FastQC: A Quality Control Tool for High Throughput Sequence Data  
735 [Online]. Available online at: <http://www.bioinformatics.babraham.ac.uk/projects/fastqc/>.  
736 (2010).
- 737 60. Gaspar, J. M. NGmerge: merging paired-end reads via novel empirically-derived models  
738 of sequencing errors. *BMC Bioinformatics* **19**, 536 (2018).
- 739 61. Langmead, B. & Salzberg, S. L. Fast gapped-read alignment with Bowtie 2. *Nat. Methods*  
740 **9**, 357–359 (2012).



- 741 62. Li, H. *et al.* The Sequence Alignment/Map format and SAMtools. *Bioinformatics* **25**,  
742 2078–2079 (2009).
- 743 63. Corces, M. R. *et al.* The chromatin accessibility landscape of primary human cancers.  
744 *Science* **362**, eaav1898 (2018).
- 745 64. van Mourik, H., Muiño, J. M., Pajoro, A., Angenent, G. C. & Kaufmann, K.  
746 Characterization of In Vivo DNA-Binding Events of Plant Transcription Factors by ChIP-  
747 seq: Experimental Protocol and Computational Analysis. in *Plant Functional Genomics:*  
748 *Methods and Protocols* (eds. Alonso, J. M. & Stepanova, A. N.) 93–121 (Springer, 2015).  
749 doi:10.1007/978-1-4939-2444-8\_5.
- 750 65. Kaufmann, K. *et al.* Chromatin immunoprecipitation (ChIP) of plant transcription factors  
751 followed by sequencing (ChIP-SEQ) or hybridization to whole genome arrays (ChIP-  
752 CHIP). *Nat Protoc* **5**, 457–72 (2010).
- 753 66. Kaufmann, K. *et al.* Target Genes of the MADS Transcription Factor SEPALLATA3:  
754 Integration of Developmental and Hormonal Pathways in the Arabidopsis Flower. *PLoS*  
755 *Biol.* **7**, e1000090 (2009).
- 756 67. Gaspar, J. M. Improved peak-calling with MACS2. *bioRxiv* (2018).
- 757 68. Jalili, V., Matteucci, M., Masseroli, M. & Morelli, M. J. Using combined evidence from  
758 replicates to evaluate ChIP-seq peaks. *Bioinformatics* **34**, 2338 (2018).
- 759 69. Boekel, J. *et al.* Multi-omic data analysis using Galaxy. *Nat. Biotechnol.* **33**, 137–139  
760 (2015).
- 761 70. The Galaxy Community. The Galaxy platform for accessible, reproducible and  
762 collaborative biomedical analyses: 2022 update. *Nucleic Acids Res.* **50**, W345–W351  
763 (2022).
- 764
- 765
- 766

767

768

769

770

771

772

773

774

775

776

777

778

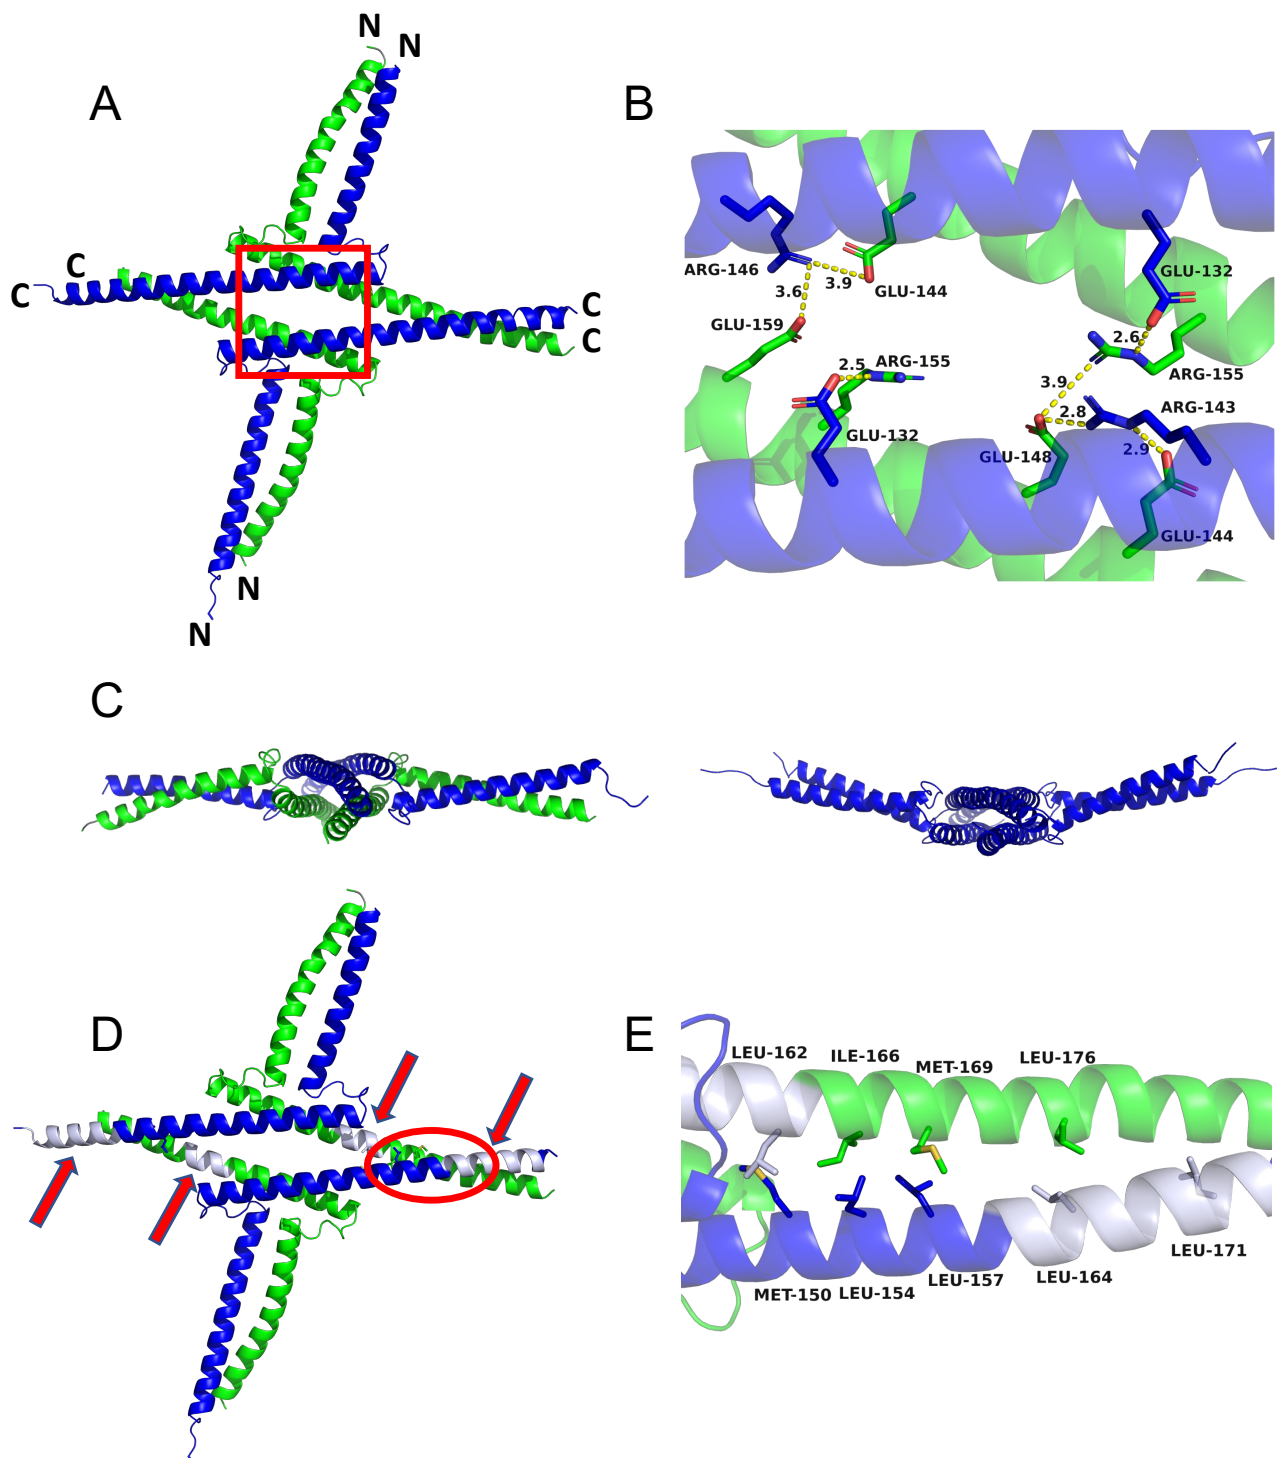

**Figure 1.** Structure of SEP3/AG heterotetramer. **A.** SEP3 (blue) and AG (green) tetramer shown as a cartoon. N- and C- termini are labeled. The red box denotes the zoomed in region in **B.** **B.** Close-up of salt bridges at the tetramerization interface of SEP3 and AG. Residues are labeled and salt bridges are shown as dashed yellow lines with distances shown. **C.** View of SEP3/AG (left) and SEP3 (right) tetramers looking down the C-terminal alpha helices. SEP3 homo-tetramer exhibits a curvature as compared to SEP3/AG heterotetramer. **D.** Cartoon representation as in **A.**, with the deletion mutations SEP3<sup>Δtet</sup> and AG<sup>Δtet</sup> colored in gray and indicated by red arrows. The circled region is rotated for clarity and shown in **E.** **E.** Close-up view of the hydrophobic tetramerization interface between the C-terminal alpha helices of SEP3 and AG. Hydrophobic residues are labeled. The SEP3<sup>Δtet3M</sup> mutations target the leucine zipper, with M150A, L154A and L157A and a deletion of residues 161-174 all affecting the tetramerization interface.

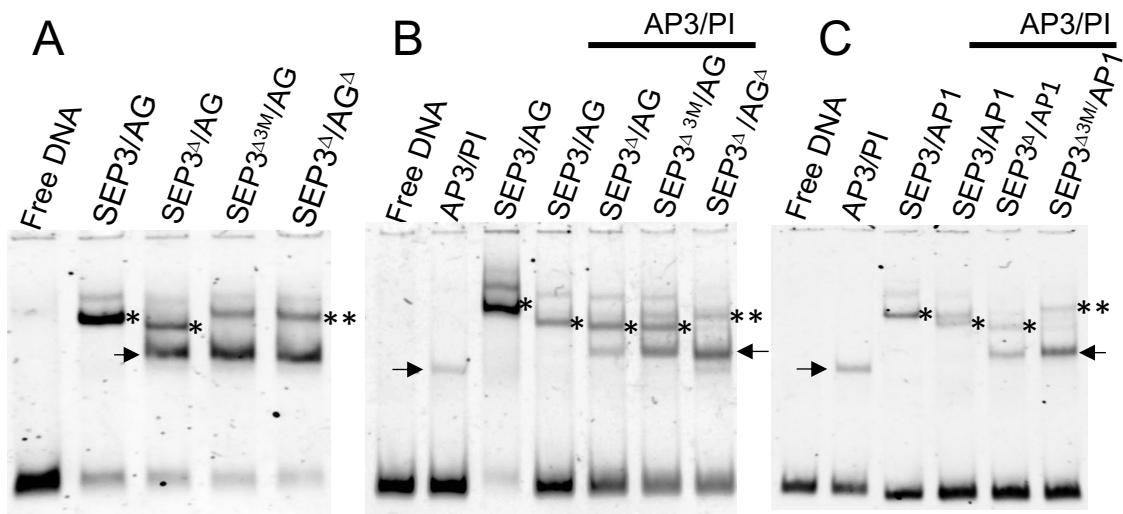

**Figure 2.** Electrophoretic mobility shift assays for MADS complexes using DNA with two CARG-box MADS binding sites. **A.** Fourth whorl C and E MADS complexes are shown with different SEP3/AG complexes forming dimers and tetramers. The wild-type SEP3/AG complex binds DNA as a tetramer, SEP3<sup>Δtet</sup>/AG binds as a mixture of dimeric and tetrameric species. SEP3<sup>Δtet3M</sup>/AG and SEP3<sup>Δtet</sup>/AG<sup>Δtet</sup> bind DNA as one or two dimers. **B.** MADS B+C+E complexes important for third whorl organ identity with SEP3/AG shown for comparison. The mixture of SEP3<sup>Δtet3M</sup>/AG/AP3/PI shows a reduction in tetramer formation while the mixture of SEP3<sup>Δtet</sup>/AG<sup>Δtet</sup>/AP3/PI does not bind DNA as a tetramer but as one or two dimers. **C.** MADS A+B+E complexes important for second whorl organ identity. The mixture of SEP3<sup>Δtet3M</sup>/AP1/AP3/PI shows a reduction in tetramer formation as compared to SEP3/AP1/AP3/PI or SEP3<sup>Δtet</sup>/AP1/AP3/PI. The AP3/PI heterodimer and SEP3/AP1 hetero-tetramer are shown for comparison. SEP3<sup>Δtet</sup> is denoted as SEP3<sup>Δ</sup> and AG<sup>Δtet</sup> as AG<sup>Δ</sup> for simplicity in the figure. Arrows indicate dimeric complexes, \* indicates a tetramer and \*\* indicates two dimers.

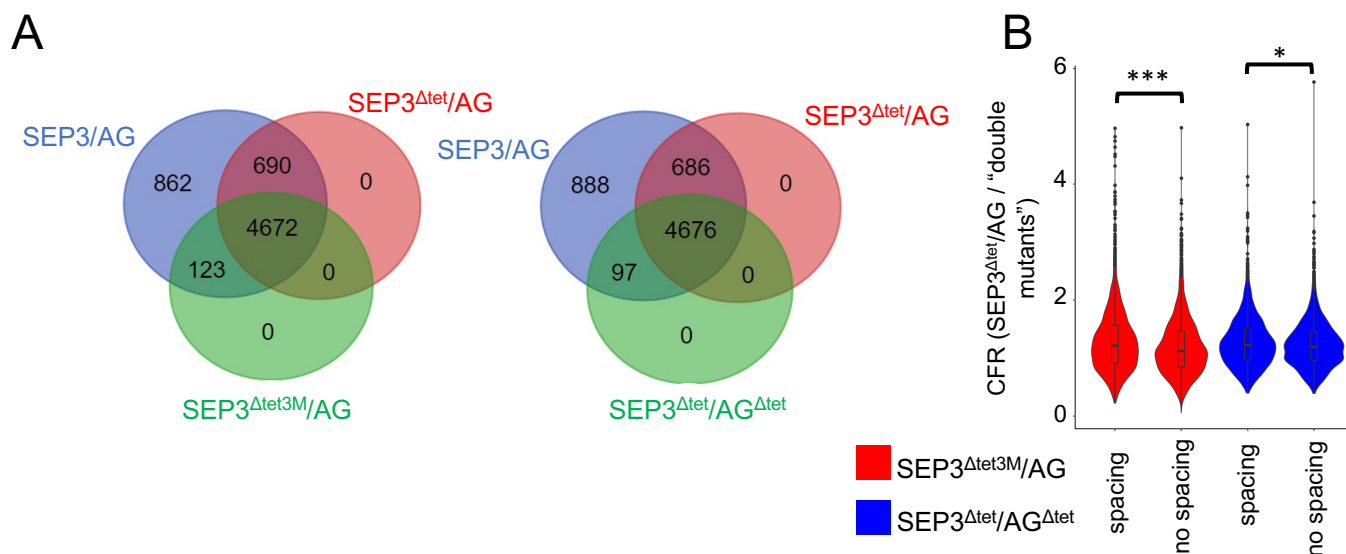

**Figure 3.** Genome-wide DNA binding comparisons determined by seq-DAP-seq for SEP3/AG wild-type and mutant complexes. **A.** Venn diagrams showing regions specifically bound by SEP3/AG (blue), SEP3<sup>Δtet</sup>/AG (red) and SEP3<sup>Δtet3M</sup>/AG (green; diagram on the left) or specifically bound by SEP3/AG (blue), SEP3<sup>Δtet</sup>/AG (red) and SEP3<sup>Δtet</sup>/AG<sup>Δtet</sup> (green; diagram on the right) complexes. Regions specifically bound are defined as having a binding intensity at least twice greater for a complex relative to the other complexes. **B.** Binding intensity ratio of SEP3<sup>Δtet</sup>/AG to SEP3<sup>Δtet3M</sup>/AG (red) and SEP3<sup>Δtet</sup>/AG to SEP3<sup>Δtet</sup>/AG<sup>Δtet</sup> (blue) over the 6,347 regions bound by SEP3/AG. The change in binding intensity is more significant for regions with a specific CARG-box intersite spacing ( $n=2270$ ) than for region with no spacing ( $n=4077$ ) for both SEP3<sup>Δtet3M</sup>/AG and SEP3<sup>Δtet</sup>/AG<sup>Δtet</sup> versus SEP3<sup>Δtet</sup>/AG (Wilcoxon test, \*\*\*:  $P < 10^{-5}$ , \*:  $P < 10^{-3}$ ).

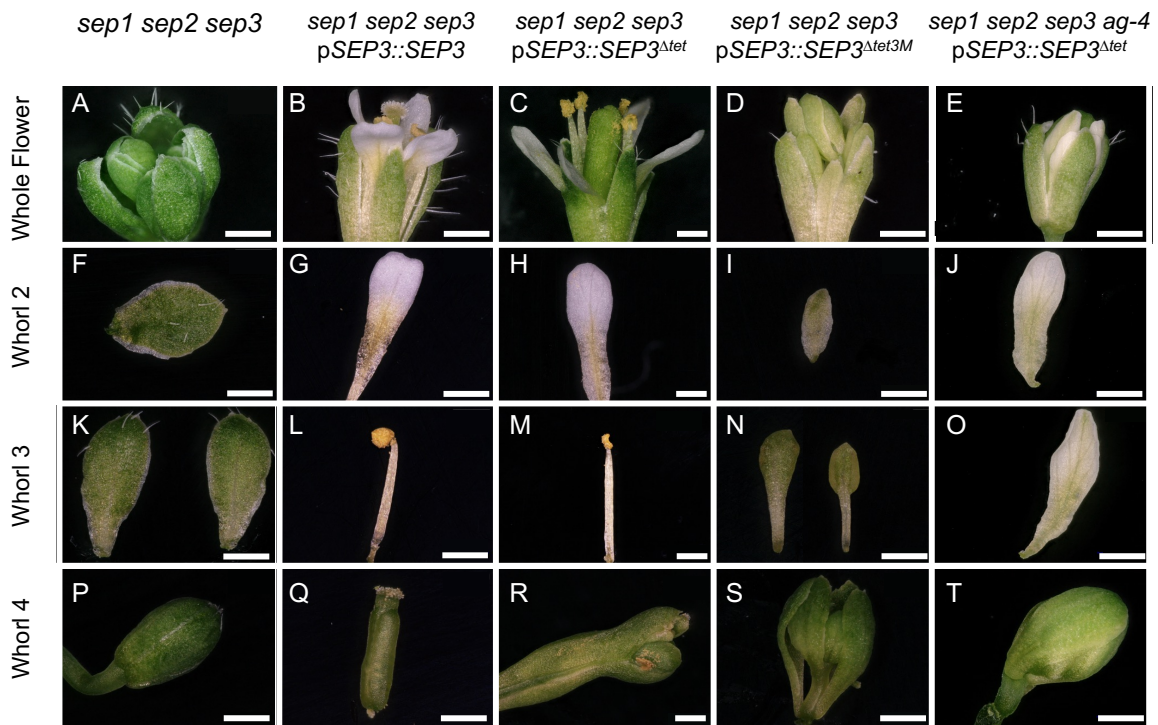

**Figure 4.** The flower and second, third and fourth whorl floral organs in *Arabidopsis* expressing wild-type and MADS mutants. **A-E.** Representative whole flowers in, from left to right, *sep1 sep2 sep3*, *sep1 sep2 sep3* expressing *SEP3*, *SEP3<sup>Atet</sup>* or *SEP3<sup>Atet3M</sup>* and *sep1 sep2 sep3 ag-4* expressing *SEP3<sup>Atet</sup>* as labeled (top). Representative organs of whorl two (**F-J**), whorl three (**K-O**) and whorl four (**P-T**) for each genotype described above. *sep1 sep2 sep3* expressing *SEP3* plants are fully complemented and show WT organs. *SEP3<sup>Atet3M</sup>* expressing plants exhibit strong floral organ phenotypes in the second, third and fourth whorls with immature green organs. The combination of *ag-4* and *SEP3<sup>Atet</sup>* triggers the complete transformation of stamen into petals in the third whorl and indeterminacy in the fourth whorl. Scale bars indicate 500  $\mu$ m.

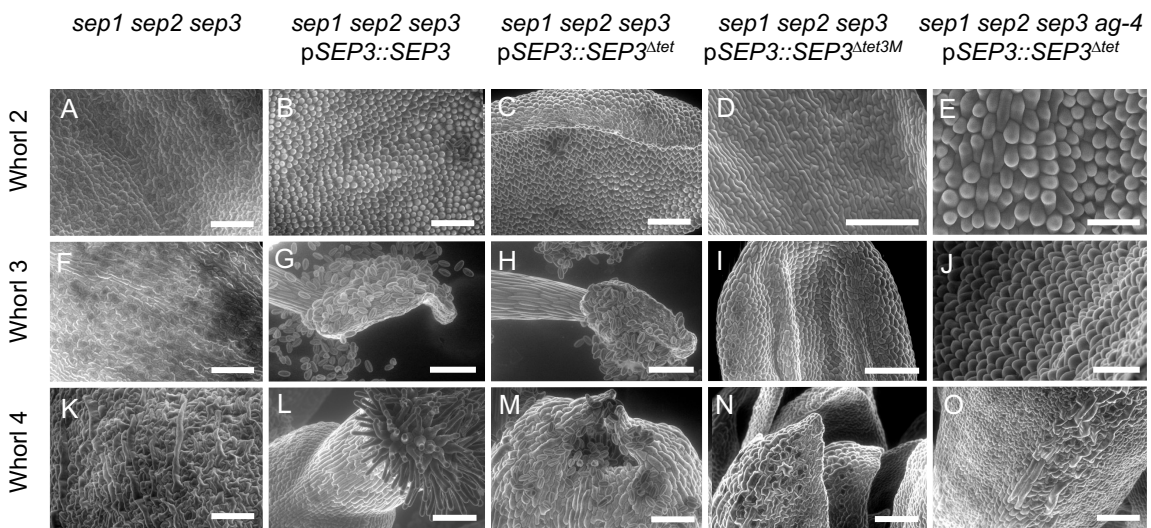

**Figure 5.** Scanning electron microscopy of epidermal cells for second, third and fourth whorl floral organs in *Arabidopsis* expressing wild-type and MADS mutants. **A-E.** SEM of adaxial cell surface of whorl 2, left to right, *sep1 sep2 sep3*, *sep1 sep2 sep3* expressing *SEP3*, *SEP3<sup>Δtet</sup>* or *SEP3<sup>Δtet3M</sup>* and *sep1 sep2 sep3 ag-4* expressing *SEP3<sup>Δtet</sup>* as labeled (top). Typical conical petal cells are observed in the *SEP3* (**B**) and *SEP3<sup>Δtet</sup>* (**C**, **E**) expressing lines, but absent in *SEP3<sup>Δtet3M</sup>* expressing lines (**D**). **F-J.** SEM of adaxial cell surface of whorl 3. Typical pollen grains are only observed in the *SEP3* (**G**) and *SEP3<sup>Δtet</sup>* (**H**) expressing lines. The triple mutant expressing *SEP3<sup>Δtet3M</sup>* (**I**) shows incomplete differentiation of the third whorl organs whereas the quadruple mutant expressing *SEP3<sup>Δtet</sup>* shows characteristic conical petal cells (**J**). **K-O.** SEM of the abaxial cell surface of whorl 4 in plants as in **A**. The triple mutant expressing *SEP3<sup>Δtet3M</sup>* (**N**) and the quadruple mutant expressing *SEP3<sup>Δtet</sup>* (**O**) exhibit elongated sepaloid cells and no stigmatic cells, whereas the triple mutant expressing *SEP3<sup>Δtet</sup>* exhibits partial complementation (**M**), with two unfused carpel with stigmatic cells present. Scale bars indicate 100 μm except for **E** (30 μm).

## Parsed Citations

1. Becker, A, Saedler, H. & Theissen, G. Distinct MADS-box gene expression patterns in the reproductive cones of the gymnosperm *Gnetum gnemon*. *Dev Genes Evol* 213, 567–72 (2003).
2. Melzer, R., Wang, Y. Q. & Theissen, G. The naked and the dead: the ABCs of gymnosperm reproduction and the origin of the angiosperm flower. *Semin Cell Dev Biol* 21, 118–28 (2010).
3. Shindo, S., Ito, M., Ueda, K., Kato, M. & Hasebe, M. Characterization of MADS genes in the gymnosperm *Gnetum parvifolium* and its implication on the evolution of reproductive organs in seed plants. *Evol. Dev.* 1, 180–190 (1999).
4. Wang, Y. Q., Melzer, R. & Theissen, G. Molecular interactions of orthologues of floral homeotic proteins from the gymnosperm *Gnetum gnemon* provide a clue to the evolutionary origin of ‘floral quartets’. *Plant J* 64, 177–90 (2010).
5. Theissen, G. & Saedler, H. Plant biology. Floral quartets. *Nature* 409, 469–71 (2001).
6. Uimari, A et al. Integration of reproductive meristem fates by a SEPALLATA-like MADS-box gene. *Proc. Natl. Acad. Sci.* 101, 15817–15822 (2004).
7. Dreni, L. & Ferrándiz, C. Tracing the Evolution of the SEPALLATA Subfamily across Angiosperms Associated with Neo- and Sub-Functionalization for Reproductive and Agronomically Relevant Traits. *Plants* 11, 2934 (2022).
8. Morel, P. et al. Divergent Functional Diversification Patterns in the SEP/AGL6/AP1 MADS-Box Transcription Factor Superclade. *Plant Cell* 31, 3033–3056 (2019).
9. Coen, E. S. & Meyerowitz, E. M. The war of the whorls: genetic interactions controlling flower development. *Nature* 353, 31–7 (1991).
10. Ruelens, P. et al. The Origin of Floral Organ Identity Quartets. *Plant Cell* 29, 229–242 (2017).
11. Kaufmann, K., Melzer, R. & Theissen, G. MIKC-type MADS-domain proteins: structural modularity, protein interactions and network evolution in land plants. *Gene* 347, 183–98 (2005).
12. Lai, X. et al. The intervening domain is required for DNA-binding and functional identity of plant MADS transcription factors. *Nat. Commun.* 12, 4760 (2021).  
Google Scholar: [Author Only](#) [Title Only](#) [Author and Title](#)
13. Kwantes, M., Liebsch, D. & Verelst, W. How MIKC\* MADS-box genes originated and evidence for their conserved function throughout the evolution of vascular plant gametophytes. *Mol Biol Evol* 29, 293–302 (2012).
14. Rümpler, F. et al. The origin of floral quartet formation - Ancient exon duplications shaped the evolution of MIKC-type MADS-domain transcription factor interactions. 2022.12.23.521771 Preprint at <https://doi.org/10.1101/2022.12.23.521771> (2022).
15. Theissen, G. Development of floral organ identity: stories from the MADS house. *Curr Opin Plant Biol* 4, 75–85 (2001).
16. Zahn, L. M. et al. The evolution of the SEPALLATA subfamily of MADS-box genes: a preangiosperm origin with multiple duplications throughout angiosperm history. *Genetics* 169, 2209–23 (2005).
17. Melzer, R. et al. DEF- and GLO-like proteins may have lost most of their interaction partners during angiosperm evolution. *Ann Bot* 114, 1431–43 (2014).
18. Melzer, R. & Theissen, G. Reconstitution of ‘floral quartets’ in vitro involving class B and class E floral homeotic proteins. *Nucleic Acids Res* 37, 2723–36 (2009).
19. Smaczniak, C. et al. Characterization of MADS-domain transcription factor complexes in *Arabidopsis* flower development. *Proc Natl Acad Sci U A* 109, 1560–5 (2012).
20. Egea-Cortines, M., Saedler, H. & Sommer, H. Ternary complex formation between the MADS-box proteins SQUAMOSA, DEFICIENS and GLOBOSA is involved in the control of floral architecture in *Antirrhinum majus*. *EMBO J* 18, 5370–9 (1999).
21. Pelaz, S., Tapia-Lopez, R., Alvarez-Buylla, E. R. & Yanofsky, M. F. Conversion of leaves into petals in *Arabidopsis*. *Curr Biol* 11, 182–4 (2001).
22. Pelaz, S., Ditta, G. S., Baumann, E., Wisman, E. & Yanofsky, M. F. B and C floral organ identity functions require SEPALLATA MADS-box genes. *Nature* 405, 200–3 (2000).
23. Ditta, G., Pinyopich, A., Robles, P., Pelaz, S. & Yanofsky, M. F. The SEP4 gene of *Arabidopsis thaliana* functions in floral organ and meristem identity. *Curr Biol* 14, 1935–40 (2004).
24. Goto, K., Kyojuka, J. & Bowman, J. L. Turning floral organs into leaves, leaves into floral organs. *Curr Opin Genet Dev* 11, 449–56 (2001).



25. Honma, T. & Goto, K. Complexes of MADS-box proteins are sufficient to convert leaves into floral organs. *Nature* 409, 525–9 (2001).
26. Mendes, M. A et al. MADS domain transcription factors mediate short-range DNA looping that is essential for target gene expression in *Arabidopsis*. *Plant Cell* 25, 2560–72 (2013).
27. Jetha, K., Theissen, G. & Melzer, R. *Arabidopsis* SEPALLATA proteins differ in cooperative DNA-binding during the formation of floral quartet-like complexes. *Nucleic Acids Res* 42, 10927–42 (2014).
28. Immink, R. G. et al. SEPALLATA3: the ‘glue’ for MADS box transcription factor complex formation. *Genome Biol* 10, R24 (2009).
29. Puranik, S. et al. Structural basis for the oligomerization of the MADS domain transcription factor SEPALLATA3 in *Arabidopsis*. *Plant Cell* 26, 3603–15 (2014).
30. Hugouvieux, V. et al. Tetramerization of MADS family transcription factors SEPALLATA3 and AGAMOUS is required for floral meristem determinacy in *Arabidopsis*. *Nucleic Acids Res* 46, 4966–4977 (2018).
31. Lai, X. et al. Genome-wide binding of SEPALLATA3 and AGAMOUS complexes determined by sequential DNA-affinity purification sequencing. *Nucleic Acids Res.* 48, 9637–9648 (2020).
32. Chojnowski, G., Pereira, J. & Lamzin, V. S. Sequence assignment for low-resolution modelling of protein crystal structures. *Acta Crystallogr. Sect. Struct. Biol.* 75, 753–763 (2019).
33. McAbee, J. M. et al. ABERRANT TESTA SHAPE encodes a KANADI family member, linking polarity determination to separation and growth of *Arabidopsis* ovule integuments. *Plant J.* 46, 522–531 (2006).
34. Eshed, Y., Baum, S. F., Perea, J. V. & Bowman, J. L. Establishment of polarity in lateral organs of plants. *Curr. Biol.* CB 11, 1251–1260 (2001).
35. Dinneny, J. R., Yadegari, R., Fischer, R. L., Yanofsky, M. F. & Weigel, D. The role of JAGGED in shaping lateral organs. *Development* 131, 1101–10 (2004).
36. Dinneny, J. R., Weigel, D. & Yanofsky, M. F. NUBBIN and JAGGED define stamen and carpel shape in *Arabidopsis*. *Development* 133, 1645–55 (2006).
37. Skinner, D. J., Dang, T. & Gasser, C. S. The *Arabidopsis* INNER NO OUTER (INO) gene acts exclusively and quantitatively in regulation of ovule outer integument development. *Plant Direct* 7, e485 (2023).
38. Yanofsky, M. F. et al. The protein encoded by the *Arabidopsis* homeotic gene *agamous* resembles transcription factors. *Nature* 346, 35–9 (1990).
39. Pellegrini, L., Tan, S. & Richmond, T. J. Structure of serum response factor core bound to DNA. *Nature* 376, 490–8 (1995).
40. Tan, S. & Richmond, T. J. Crystal structure of the yeast MAT $\alpha$ 2/MCM1/DNA ternary complex. *Nature* 391, 660–6 (1998).
41. Gramzow, L. & Theissen, G. A hitchhiker’s guide to the MADS world of plants. *Genome Biol* 11, 214 (2010).  
Google Scholar: [Author Only](#) [Title Only](#) [Author and Title](#)
42. Rumpler, F., Theissen, G. & Melzer, R. A conserved leucine zipper-like motif accounts for strong tetramerization capabilities of SEPALLATA-like MADS-domain transcription factors. *J Exp Bot* 69, 1943–1954 (2018).
43. Hugouvieux, V. & Zubieta, C. MADS transcription factors cooperate: complexities of complex formation. *J Exp Bot* 69, 1821–1823 (2018).
44. Sieburth, L. E., Running, M. P. & Meyerowitz, E. M. Genetic separation of third and fourth whorl functions of AGAMOUS. *Plant Cell* 7, 1249–58 (1995).
45. CHOPCHOP v3: expanding the CRISPR web toolbox beyond genome editing | *Nucleic Acids Research* | Oxford Academic.  
<https://academic-oup-com.insb.bib.cnrs.fr/nar/article/47/W1/W171/5491735>.  
Google Scholar: [Author Only](#) [Title Only](#) [Author and Title](#)
46. Yan, W., Chen, D. & Kaufmann, K. Efficient multiplex mutagenesis by RNA-guided Cas9 and its use in the characterization of regulatory elements in the AGAMOUS gene. *Plant Methods* 12, 23 (2016).  
Google Scholar: [Author Only](#) [Title Only](#) [Author and Title](#)
47. Bensmihen, S. et al. Analysis of an activated ABI5 allele using a new selection method for transgenic *Arabidopsis* seeds. *FEBS Lett* 561, 127–31 (2004).
48. Clough, S. J. & Bent, A. F. Floral dip: a simplified method for *Agrobacterium*-mediated transformation of *Arabidopsis thaliana*. *Plant J. Cell Mol. Biol.* 16, 735–743 (1998).
49. Doubleie, S. Production of selenomethionyl proteins in prokaryotic and eukaryotic expression systems. *Methods Mol Biol* 363,

91–108 (2007).

50. Gbadinho, J. et al. MxCuBE: a synchrotron beamline control environment customized for macromolecular crystallography experiments. *J Synchrotron Radiat* 17, 700–7 (2010).

51. Kabsch, W. Xds. *Acta Crystallogr Biol Crystallogr* 66, 125–32 (2010).

52. Monaco, S. et al. Automatic processing of macromolecular crystallography X-ray diffraction data at the ESRF. *J. Appl. Crystallogr.* 46, 804–810 (2013).

53. Zander, U. et al. Merging of synchrotron serial crystallographic data by a genetic algorithm. *Acta Crystallogr Struct Biol* 72, 1026–35 (2016).

54. Skubák, P. et al. A new MR-SAD algorithm for the automatic building of protein models from low-resolution X-ray data and a poor starting model. *IUCrJ* 5, 166–171 (2018).

55. McCoy, A. J. Solving structures of protein complexes by molecular replacement with Phaser. *Acta Crystallogr Biol Crystallogr* 63, 32–41 (2007).

56. Emsley, P., Lohkamp, B., Scott, W. G. & Cowtan, K. Features and development of Coot. *Acta Crystallogr Biol Crystallogr* 66, 486–501 (2010).

57. Murshudov, G. N., Vagin, A. A & Dodson, E. J. Refinement of macromolecular structures by the maximum-likelihood method. *Acta Crystallogr. D Biol. Crystallogr.* 53, 240–255 (1997).

58. Williams, C. J. et al. MolProbity: More and better reference data for improved all-atom structure validation. *Protein Sci. Publ. Protein Soc.* 27, 293–315 (2018).

59. Andrews, S. FastQC: A Quality Control Tool for High Throughput Sequence Data [Online]. Available online at: <http://www.bioinformatics.babraham.ac.uk/projects/fastqc/>. (2010).

60. Gaspar, J. M. NGmerge: merging paired-end reads via novel empirically-derived models of sequencing errors. *BMC Bioinformatics* 19, 536 (2018).

Google Scholar: [Author Only](#) [Title Only](#) [Author and Title](#)

61. Langmead, B. & Salzberg, S. L. Fast gapped-read alignment with Bowtie 2. *Nat. Methods* 9, 357–359 (2012).

62. Li, H. et al. The Sequence Alignment/Map format and SAMtools. *Bioinformatics* 25, 2078–2079 (2009).

63. Corces, M. R. et al. The chromatin accessibility landscape of primary human cancers. *Science* 362, eaav1898 (2018).

64. van Mourik, H., Muiño, J. M., Pajoro, A., Angenent, G. C. & Kaufmann, K. Characterization of In Vivo DNA-Binding Events of Plant Transcription Factors by ChIP-seq: Experimental Protocol and Computational Analysis. in *Plant Functional Genomics: Methods and Protocols* (eds. Alonso, J. M. & Stepanova, A. N.) 93–121 (Springer, 2015). doi:10.1007/978-1-4939-2444-8\_5.

Google Scholar: [Author Only](#) [Title Only](#) [Author and Title](#)

65. Kaufmann, K. et al. Chromatin immunoprecipitation (ChIP) of plant transcription factors followed by sequencing (ChIP-SEQ) or hybridization to whole genome arrays (ChIP-CHIP). *Nat Protoc* 5, 457–72 (2010).

66. Kaufmann, K. et al. Target Genes of the MADS Transcription Factor SEPALLATA3: Integration of Developmental and Hormonal Pathways in the Arabidopsis Flower. *PLoS Biol.* 7, e1000090 (2009).

67. Gaspar, J. M. Improved peak-calling with MACS2. *bioRxiv* (2018).

68. Jalili, V., Matteucci, M., Masseroli, M. & Morelli, M. J. Using combined evidence from replicates to evaluate ChIP-seq peaks. *Bioinformatics* 34, 2338 (2018).

Google Scholar: [Author Only](#) [Title Only](#) [Author and Title](#)

69. Boekel, J. et al. Multi-omic data analysis using Galaxy. *Nat. Biotechnol.* 33, 137–139 (2015).

70. The Galaxy Community. The Galaxy platform for accessible, reproducible and collaborative biomedical analyses: 2022 update. *Nucleic Acids Res.* 50, W345–W351 (2022).
